# Supplementary material for: New genes often acquire male-specific functions but rarely become essential in Drosophila
Source: PubMed Central journal article supplement — Genes Dev. 2017 Sep 15;31(18):1841–6. doi: 10.1101/gad.303131.117 (PMC5695085; doi:10.1101/gad.303131.117), 2017-09-15

**Supplementary Figure 8.** Spatiotemporal expression patterns for individual *D. melanogaster* genes with only mel-complex orthologs (present in *Dmel/sim/sech*).

# mel-complex Acp29AB – CG17797

FPKM

1000

500

0

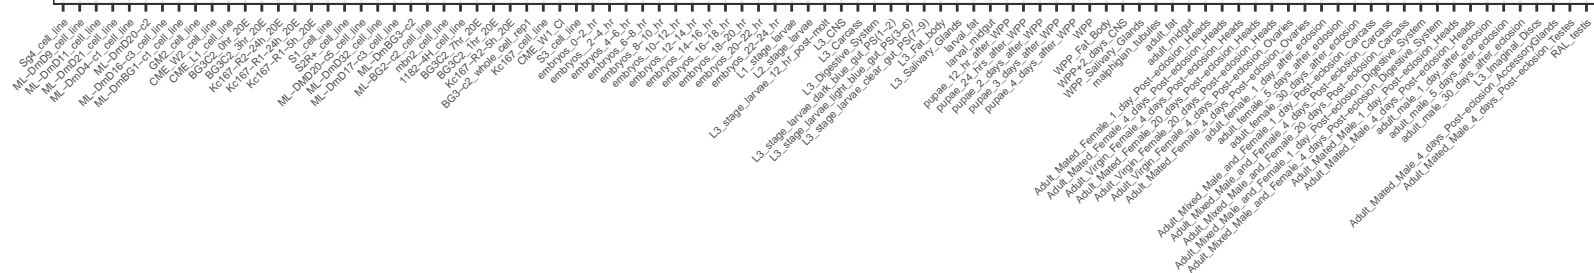

# mel-complex betaNACtes2 – CG18157

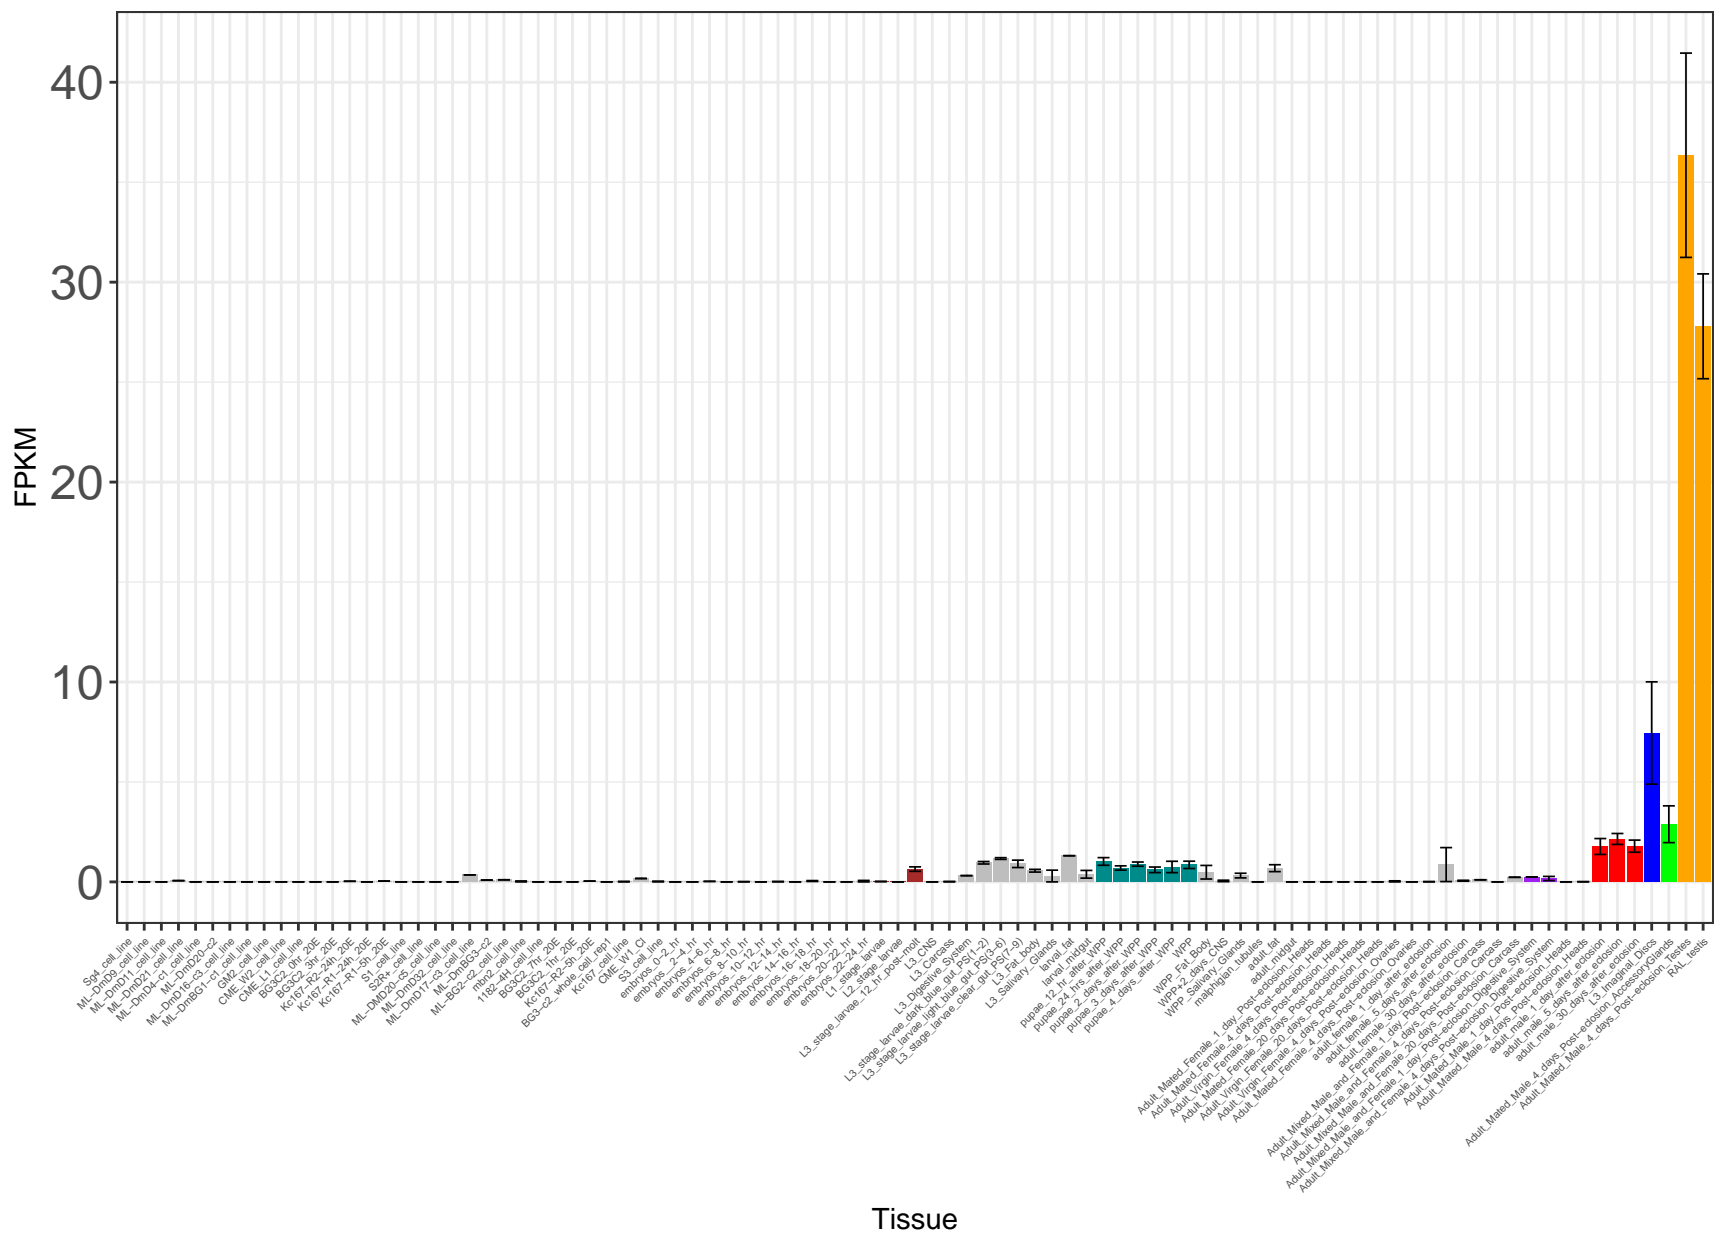



# mel-complex CG11023 – CG11023

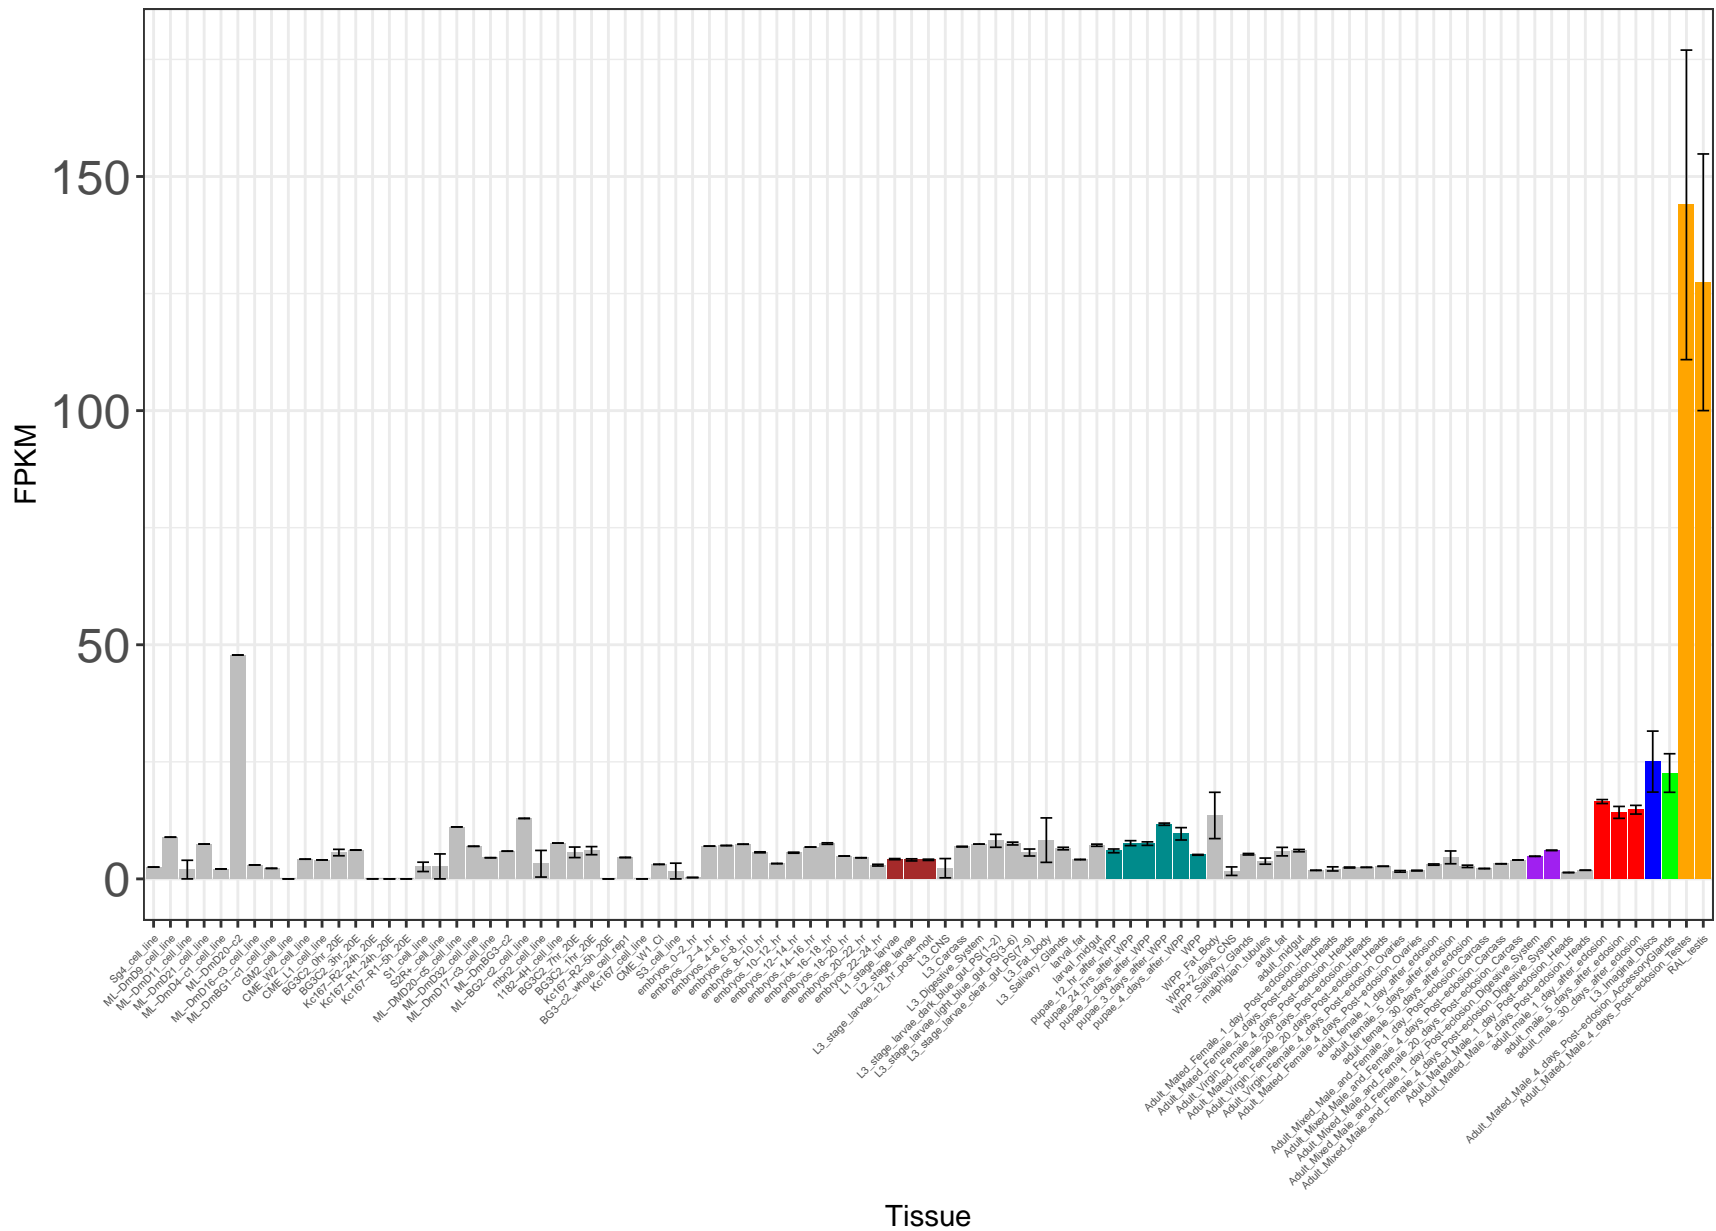



# mel-complex CG12184 – CG12184

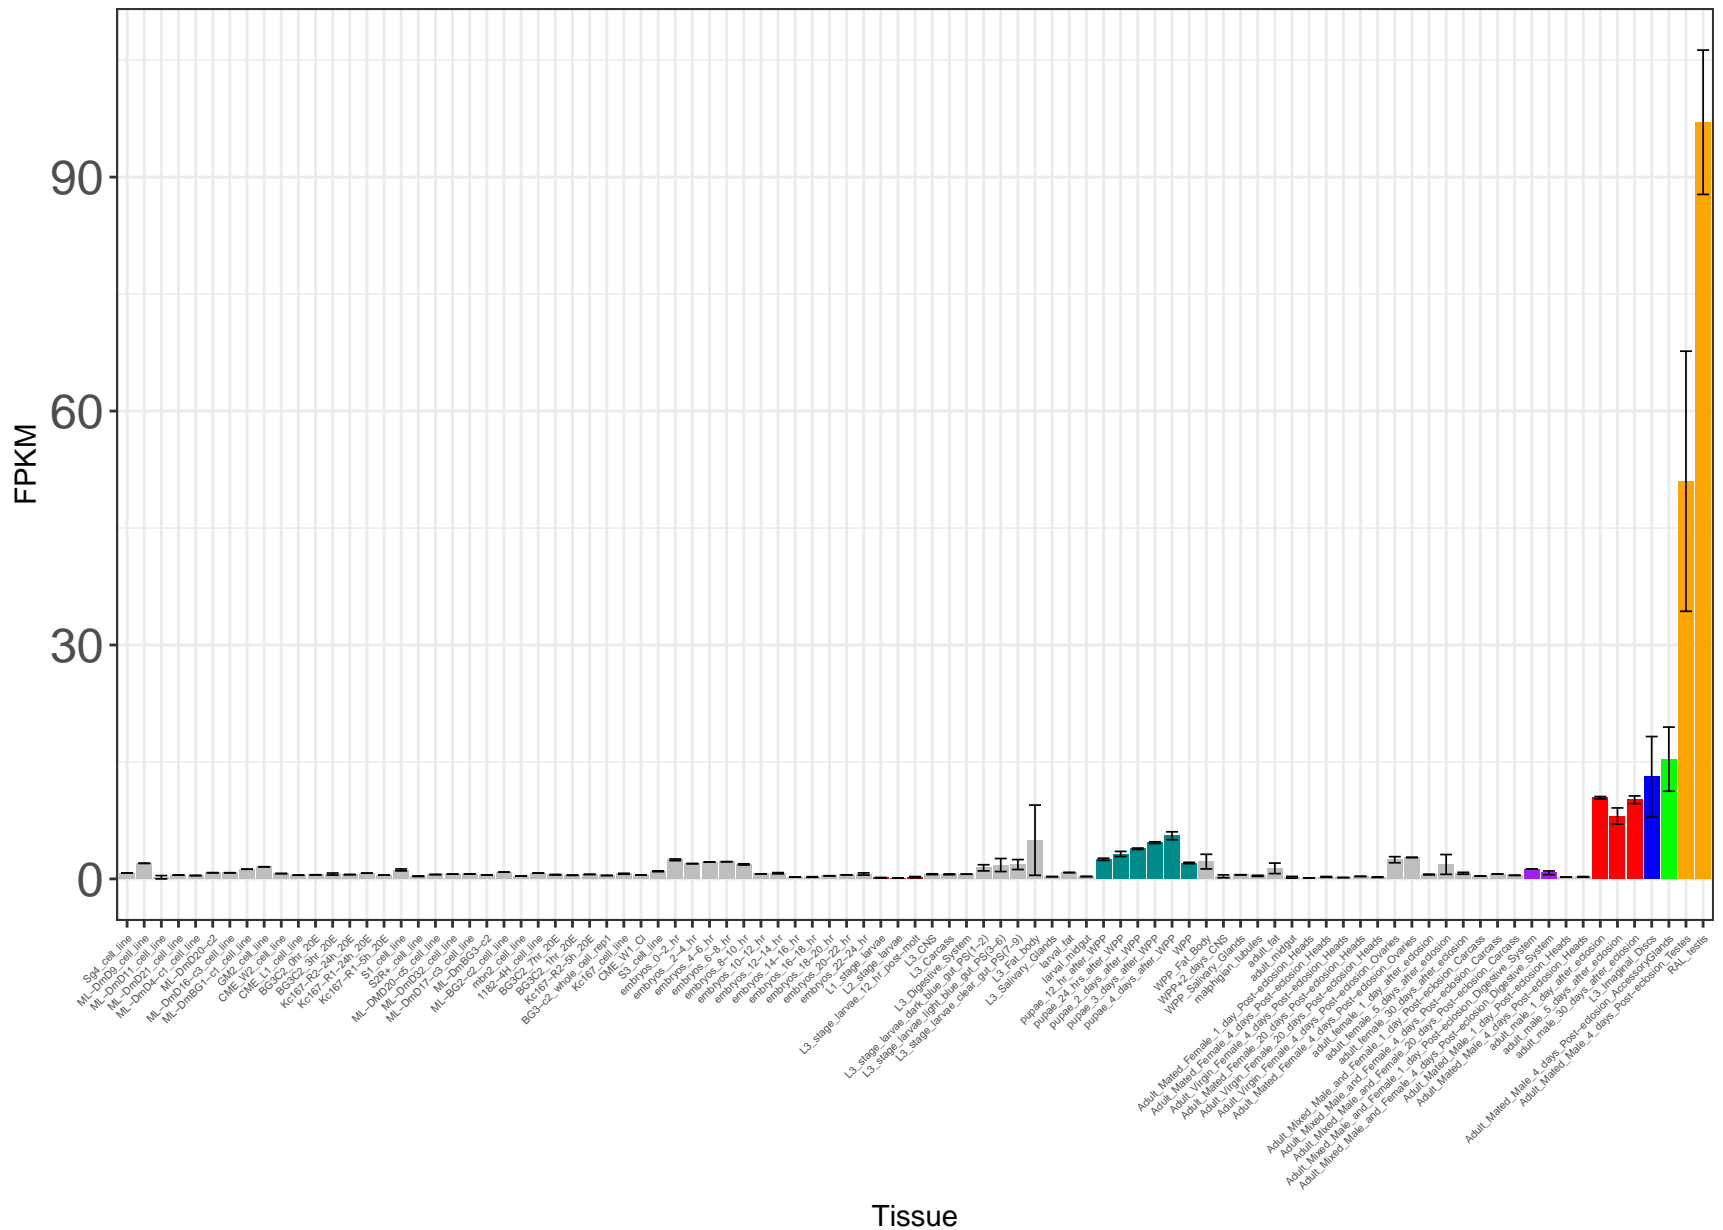













































# mel-complex CG33926 – CG33926

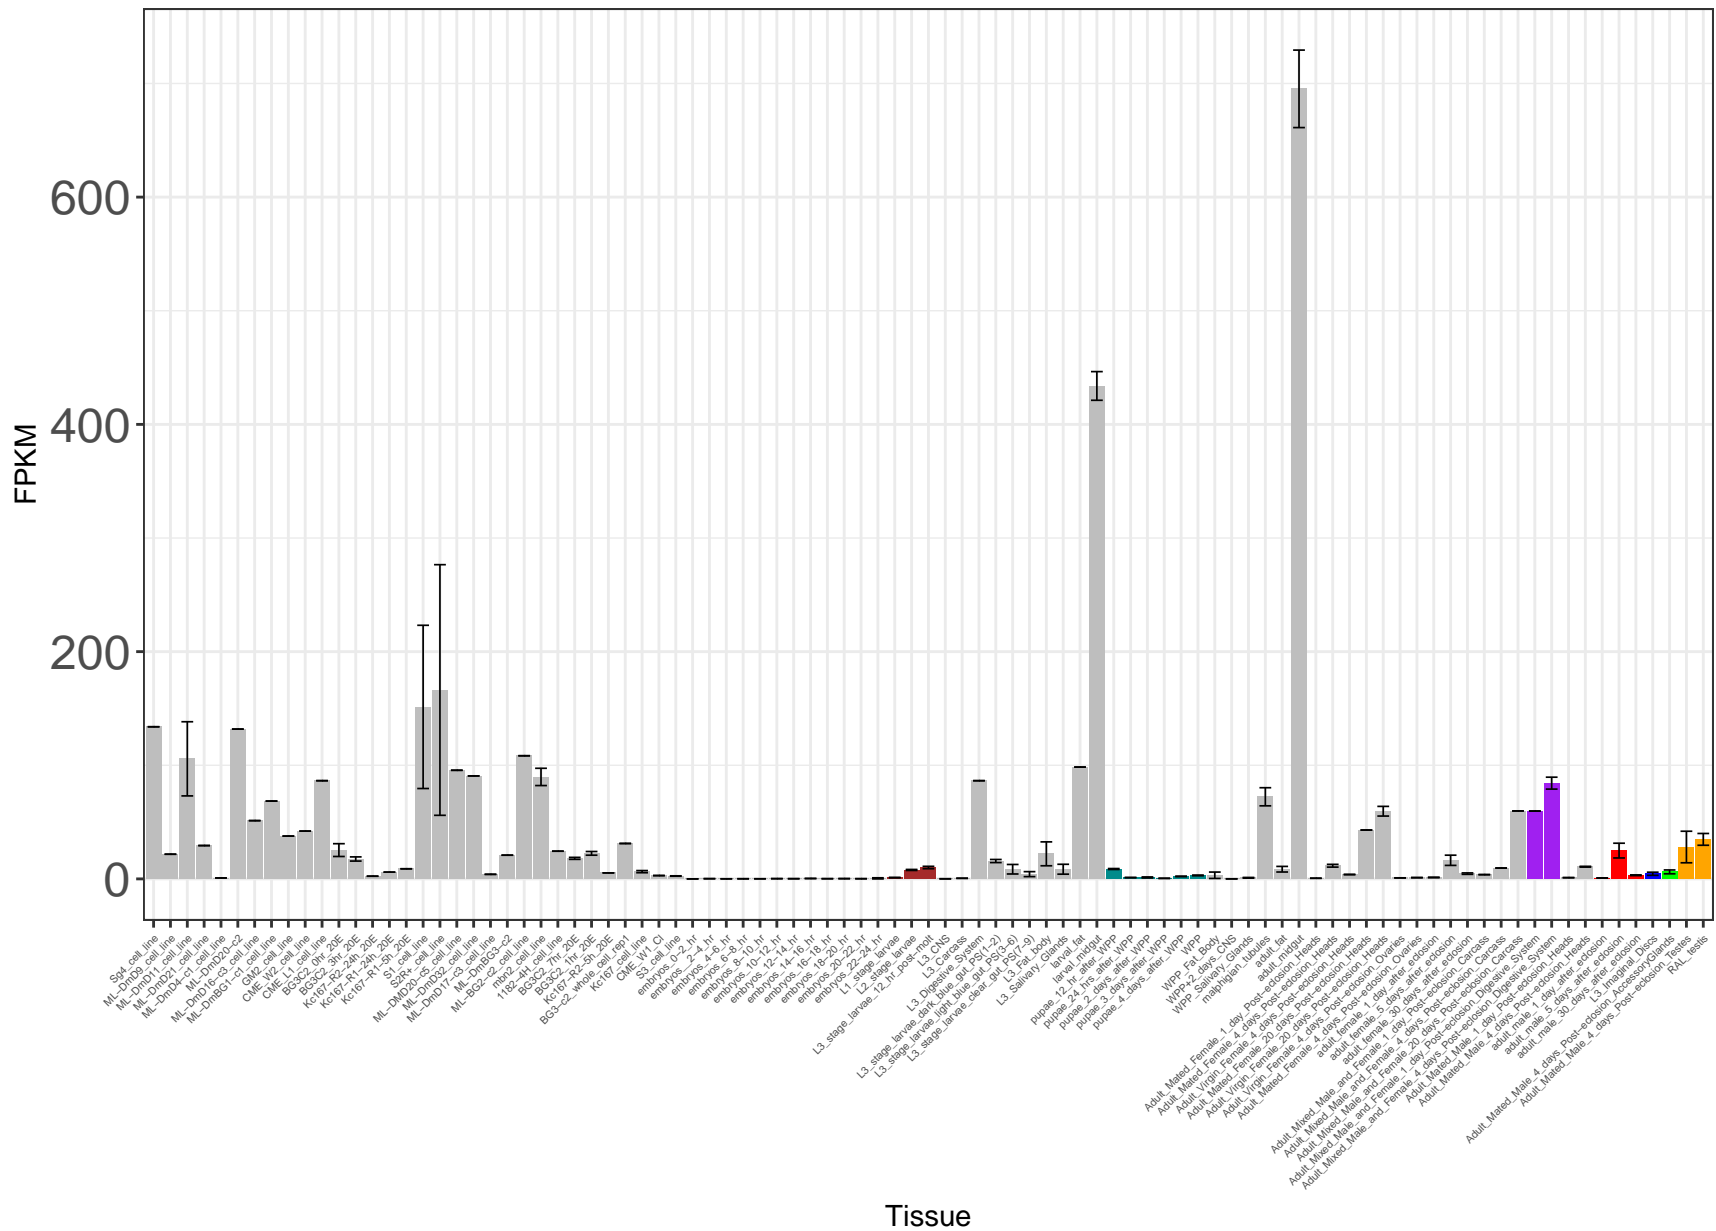





# mel-complex CG3927 - CG3927

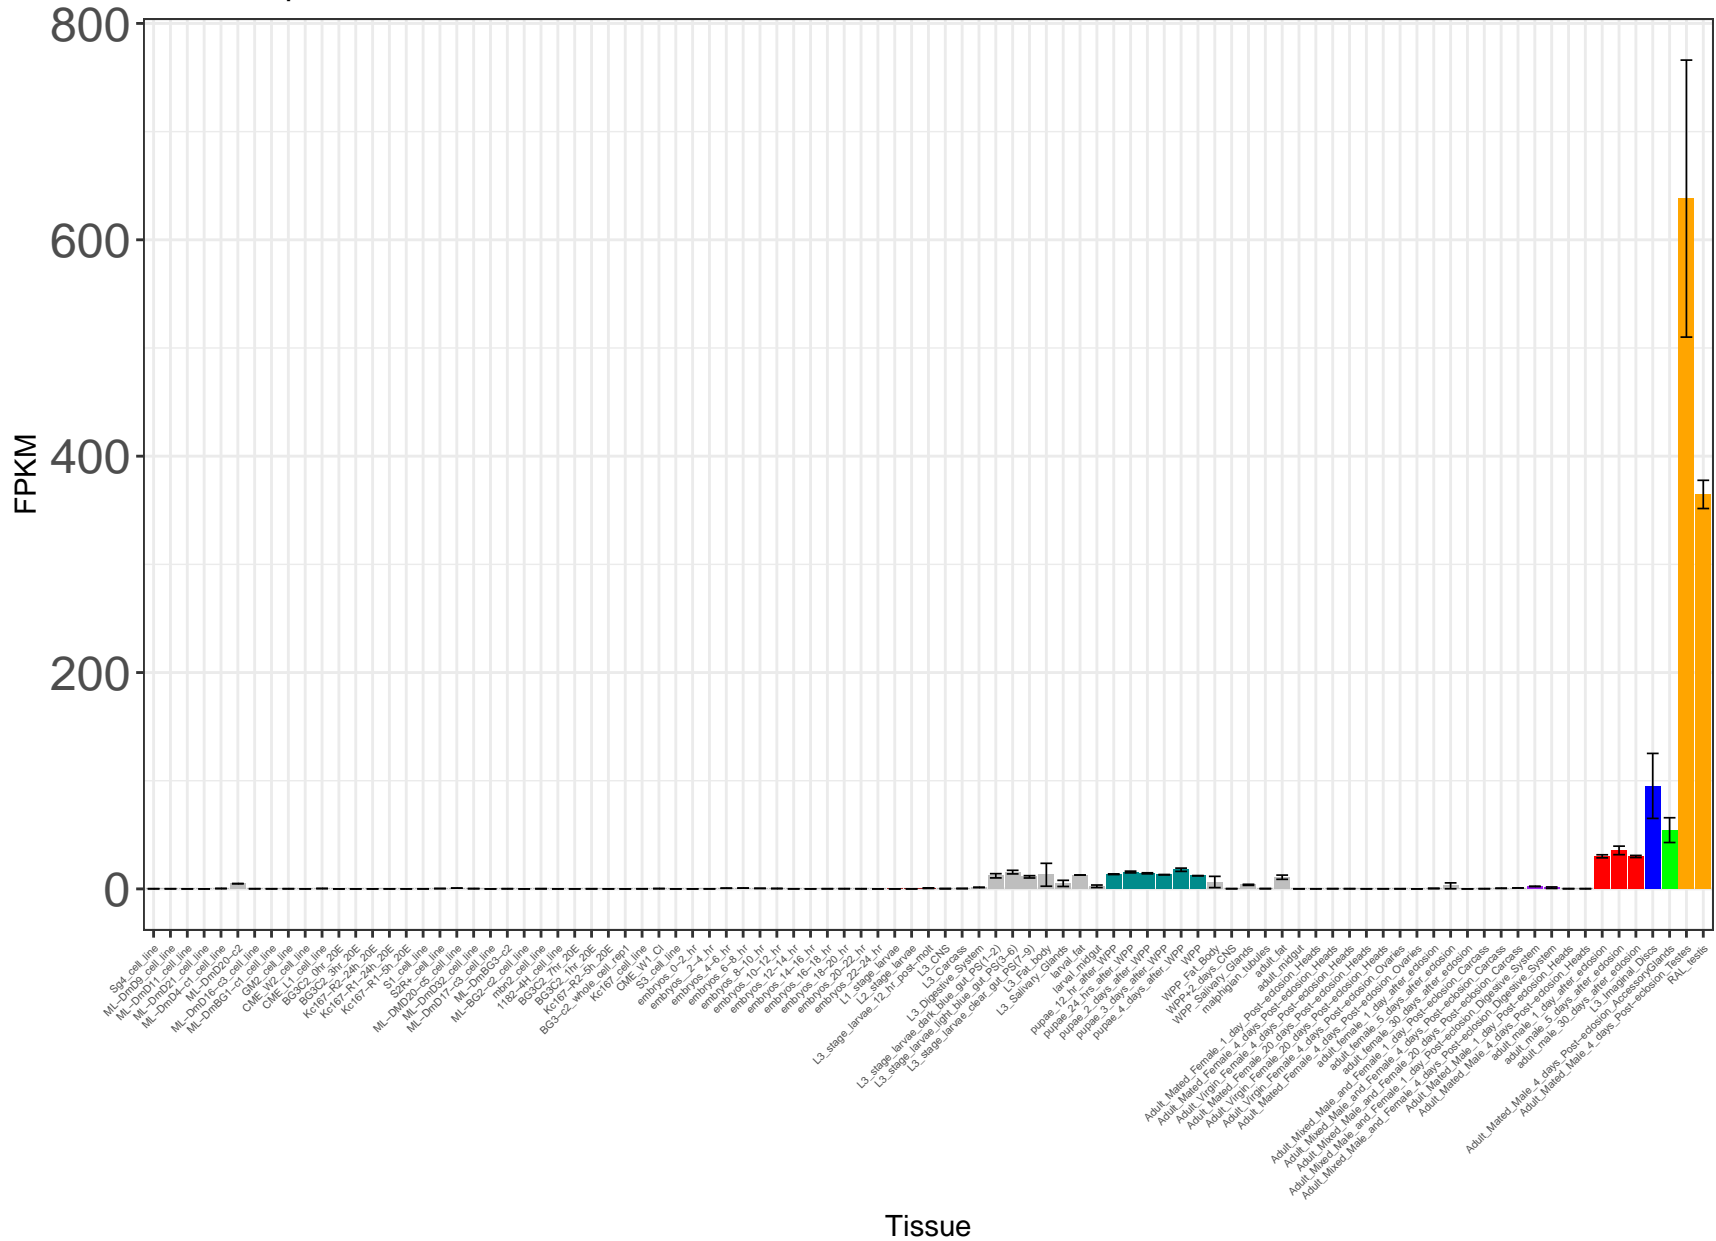







mel-complex CG42300 – CG42300

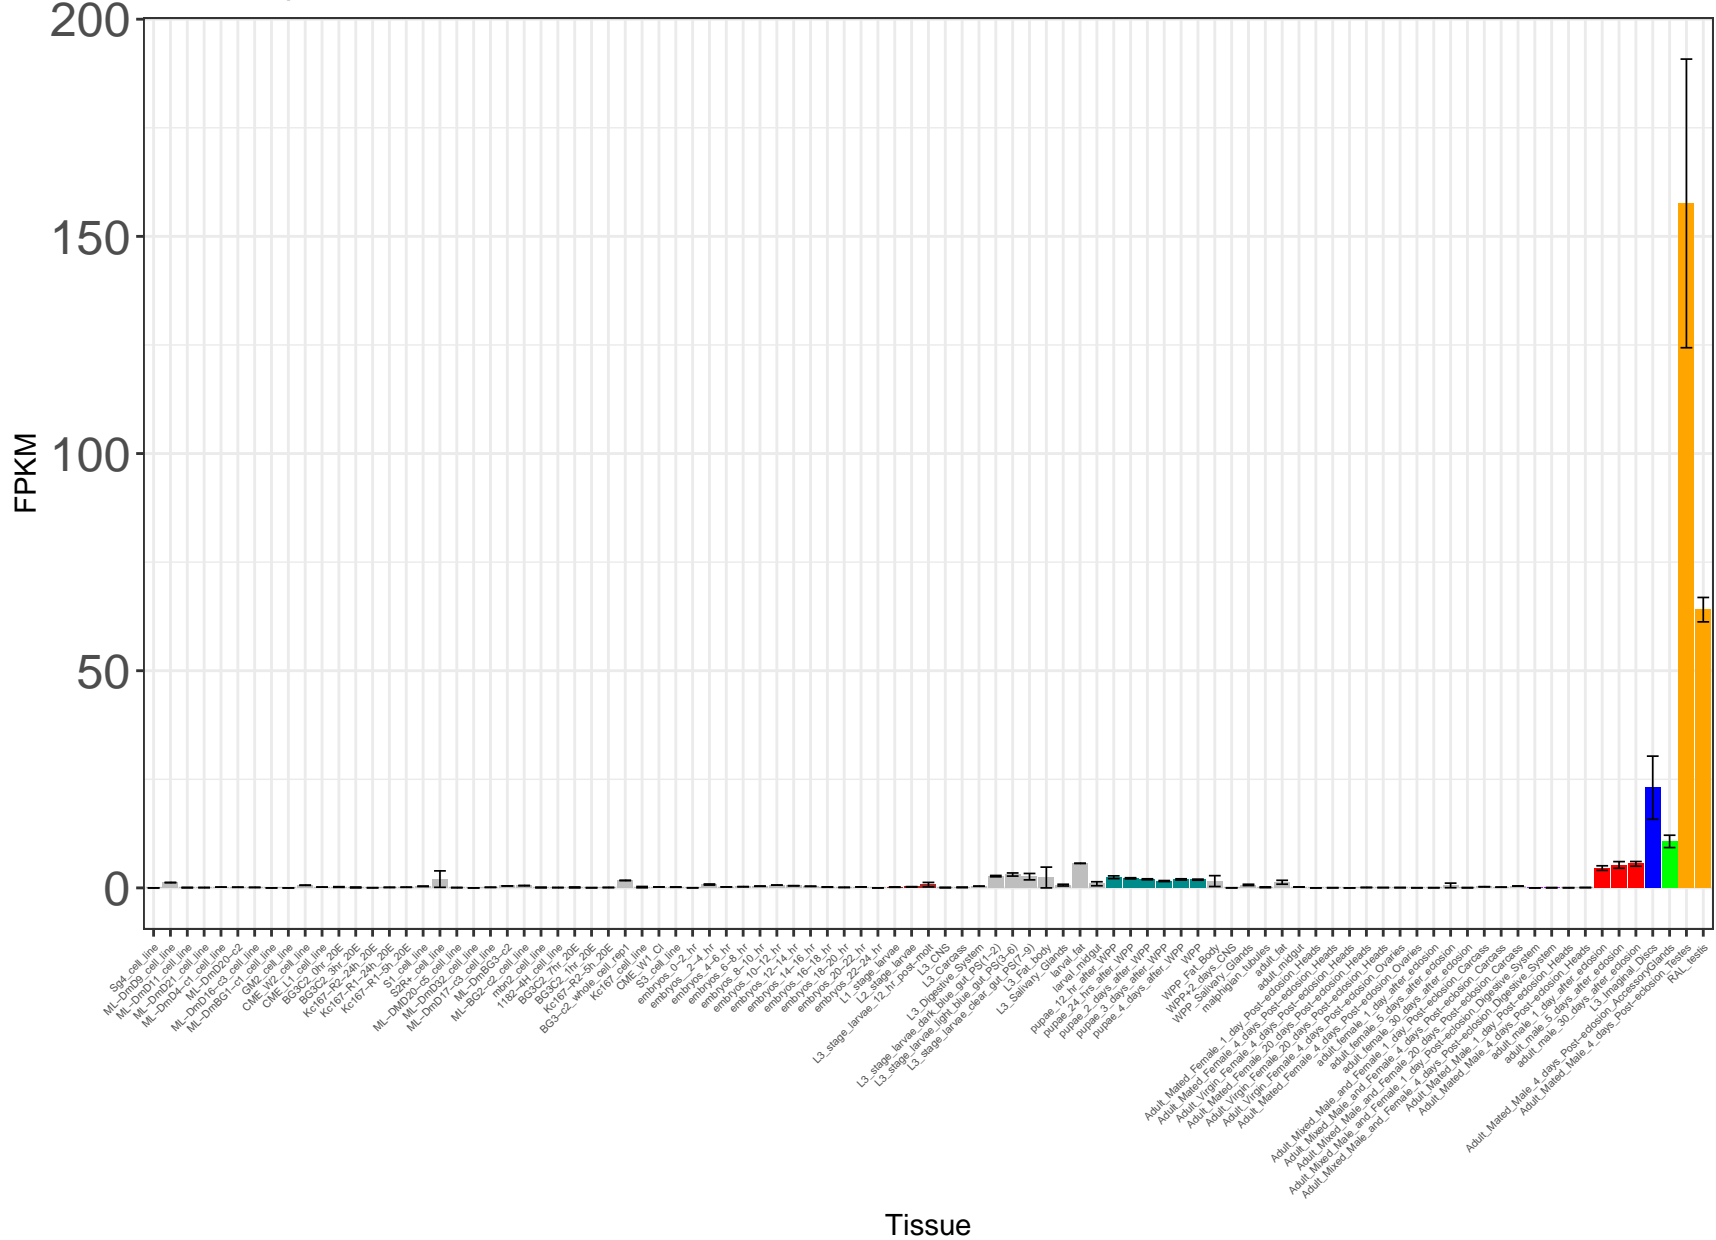







# mel-complex CG42581 – CG42581

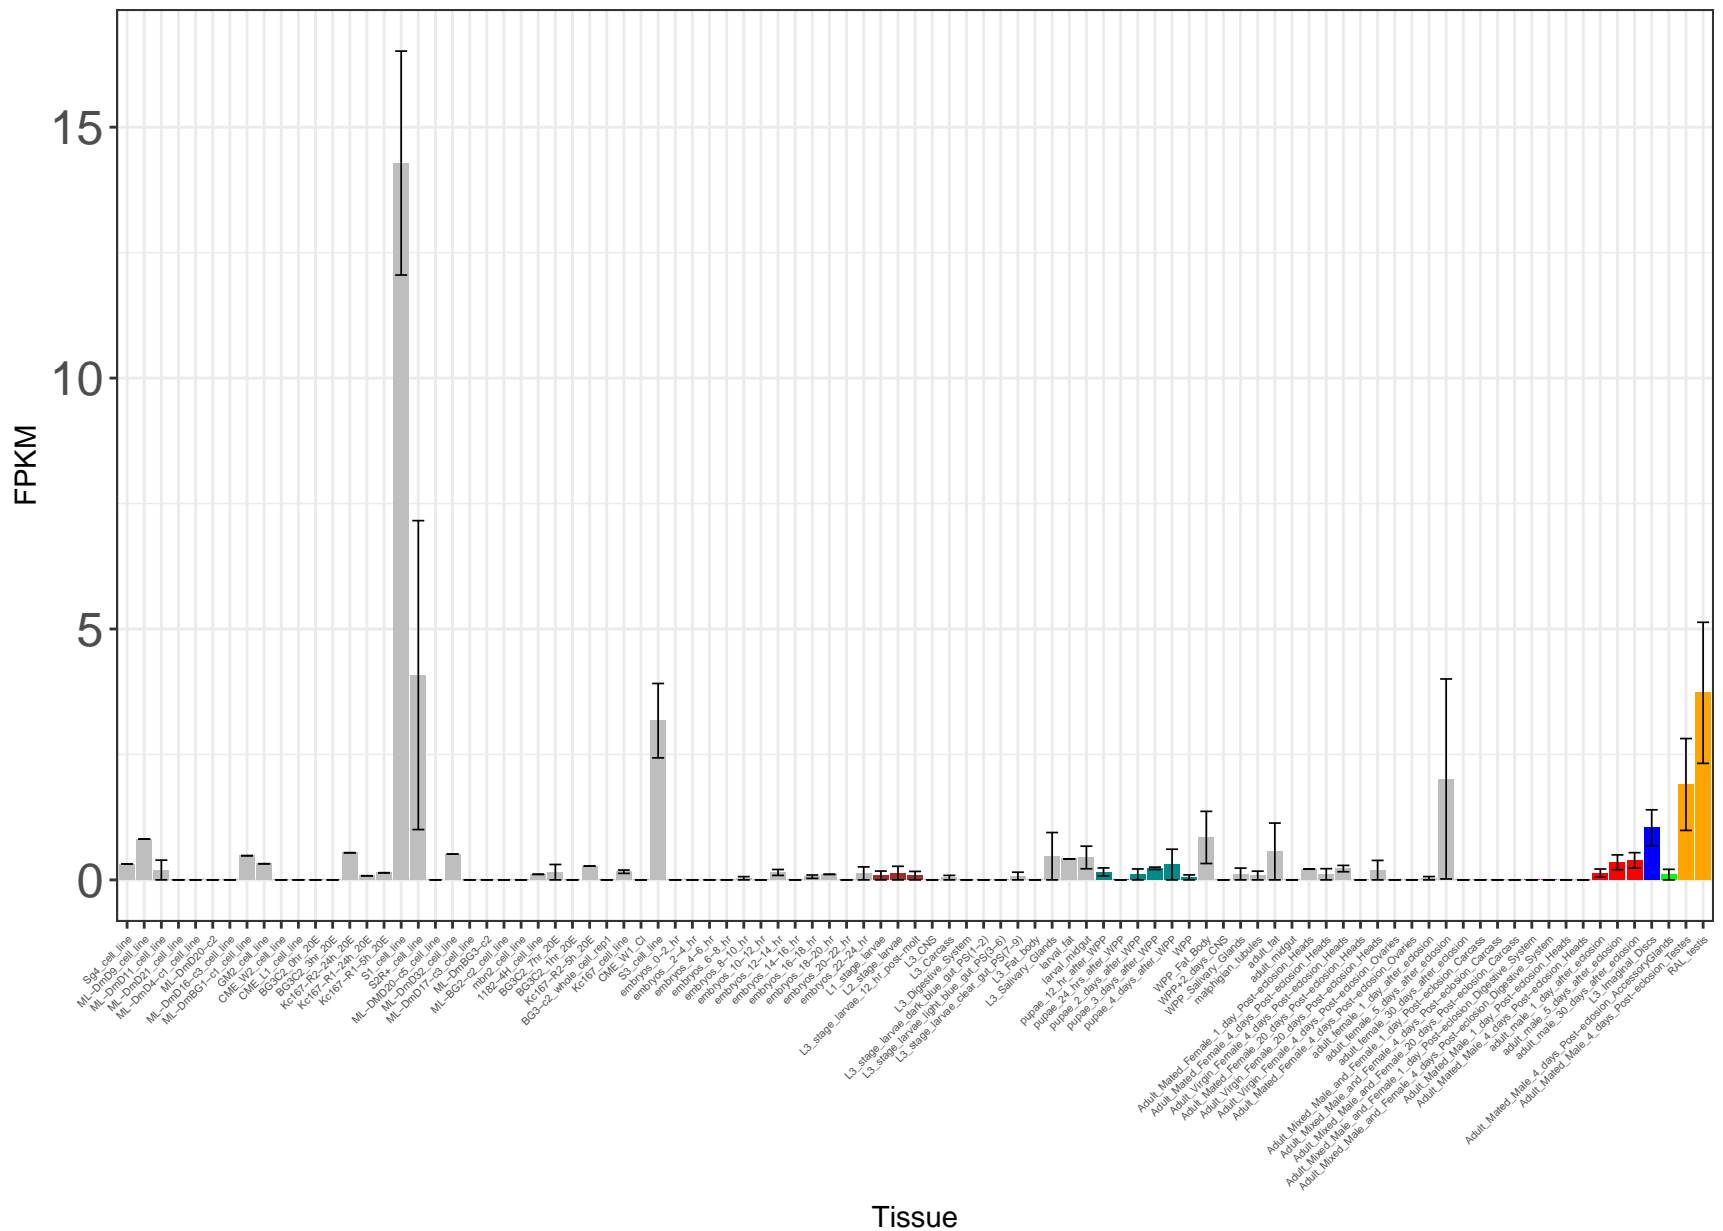

# mel-complex CG42598 – CG42598

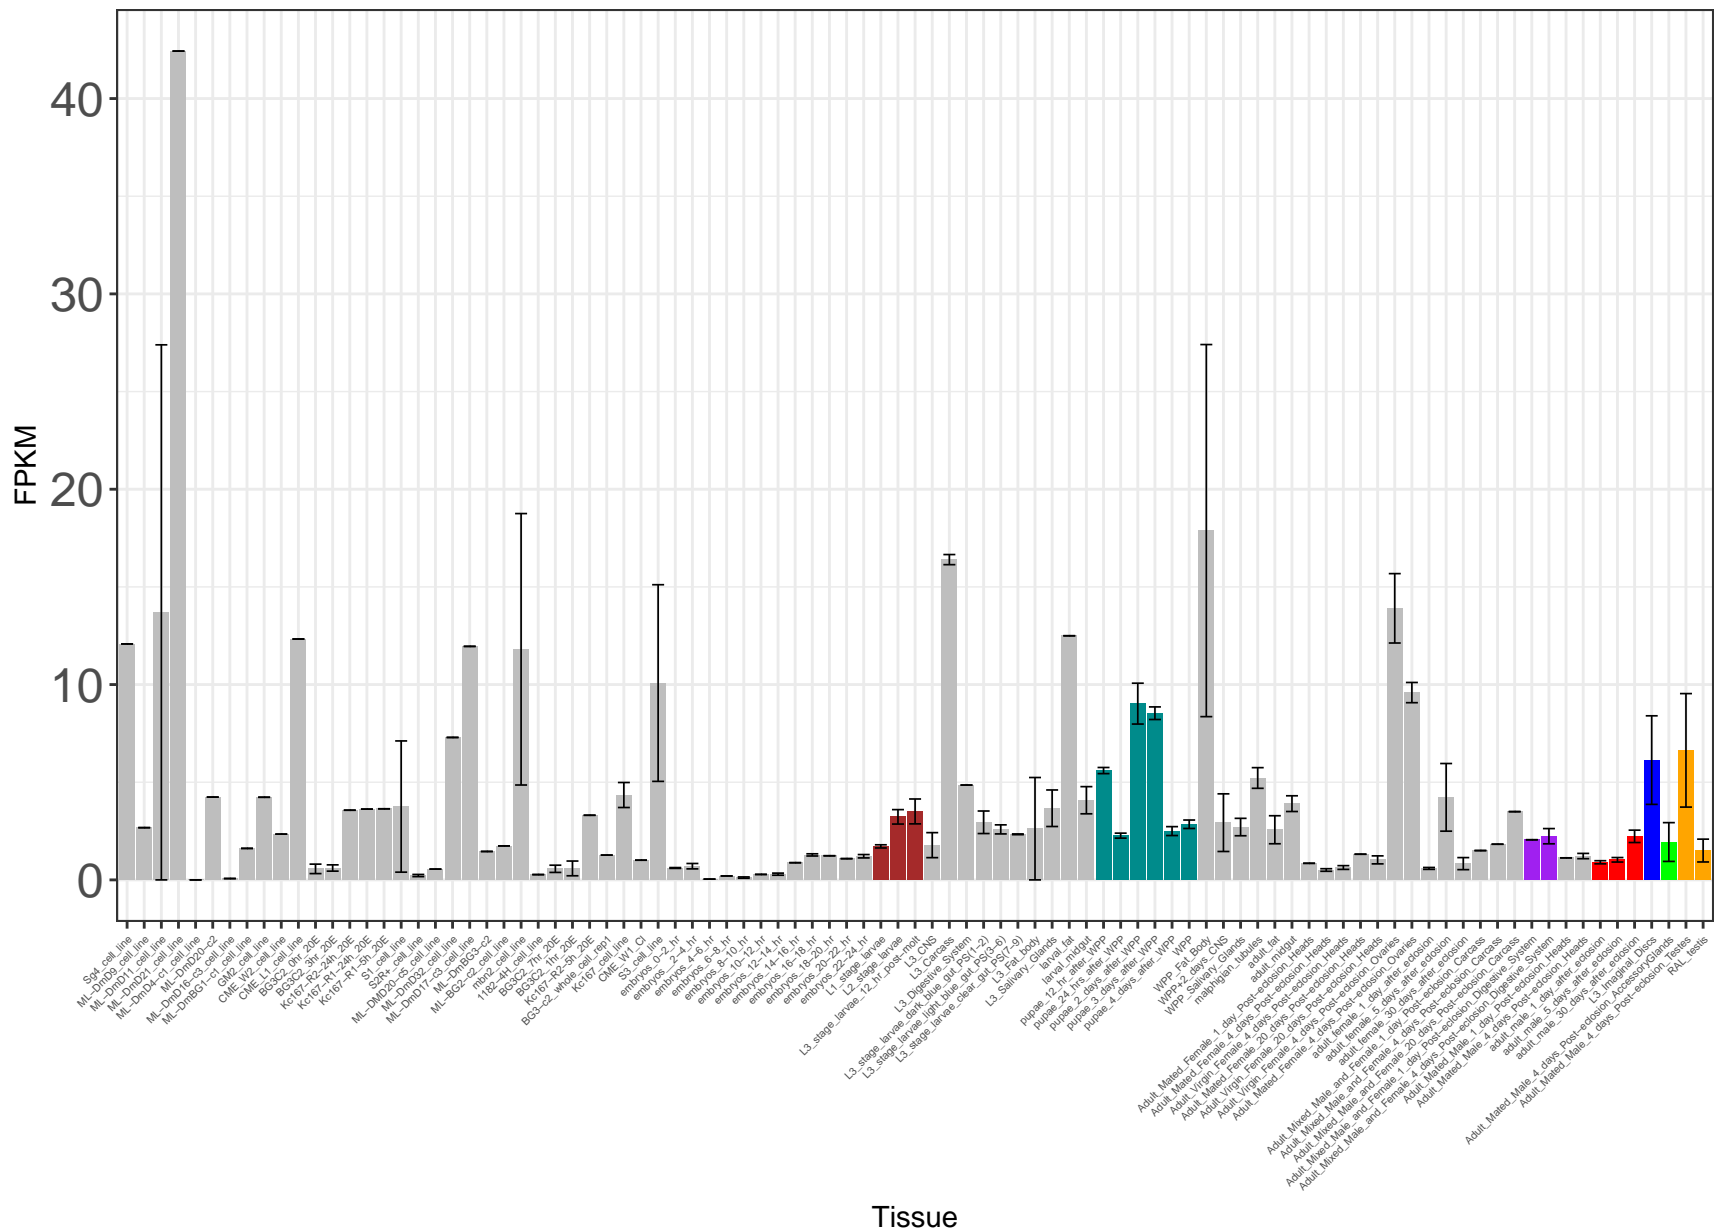

































































# mel-complex CG5334 – CG5334

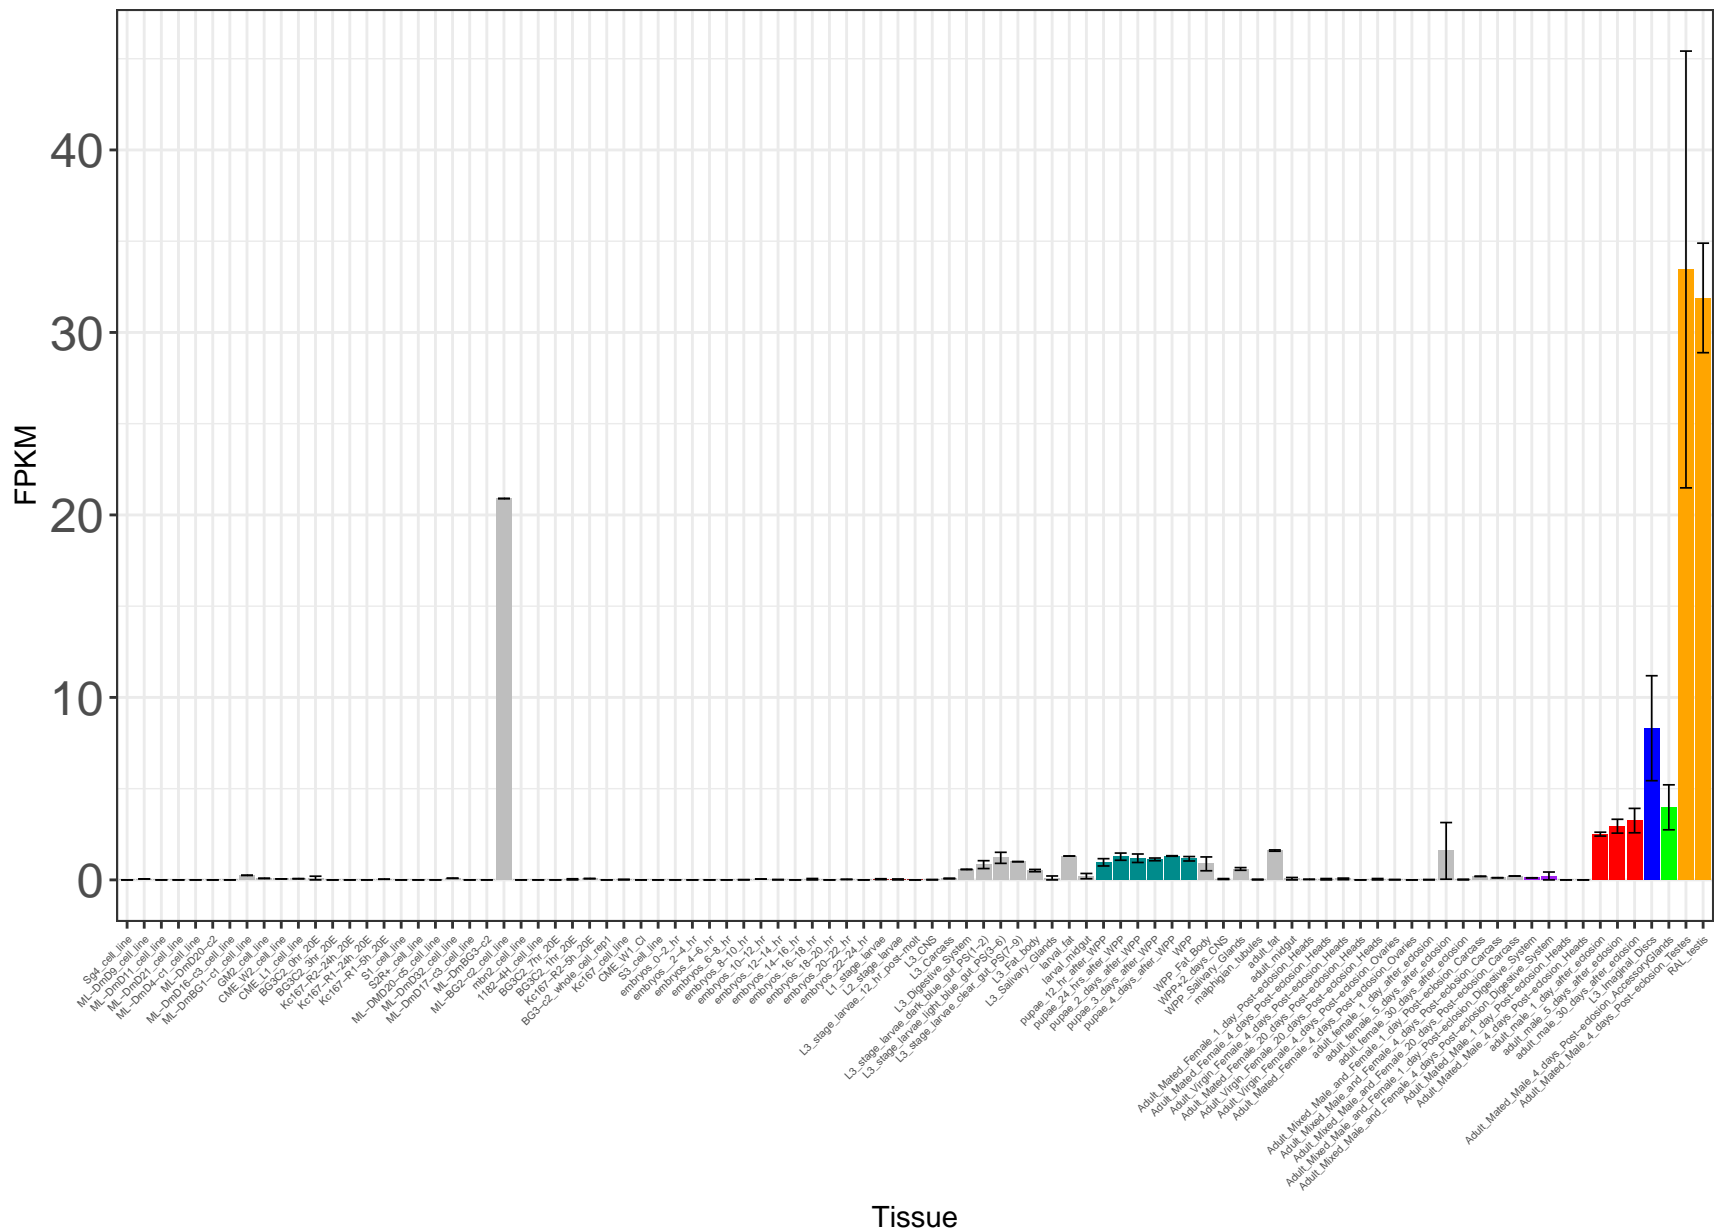







# mel-complex CG9902 – CG9902

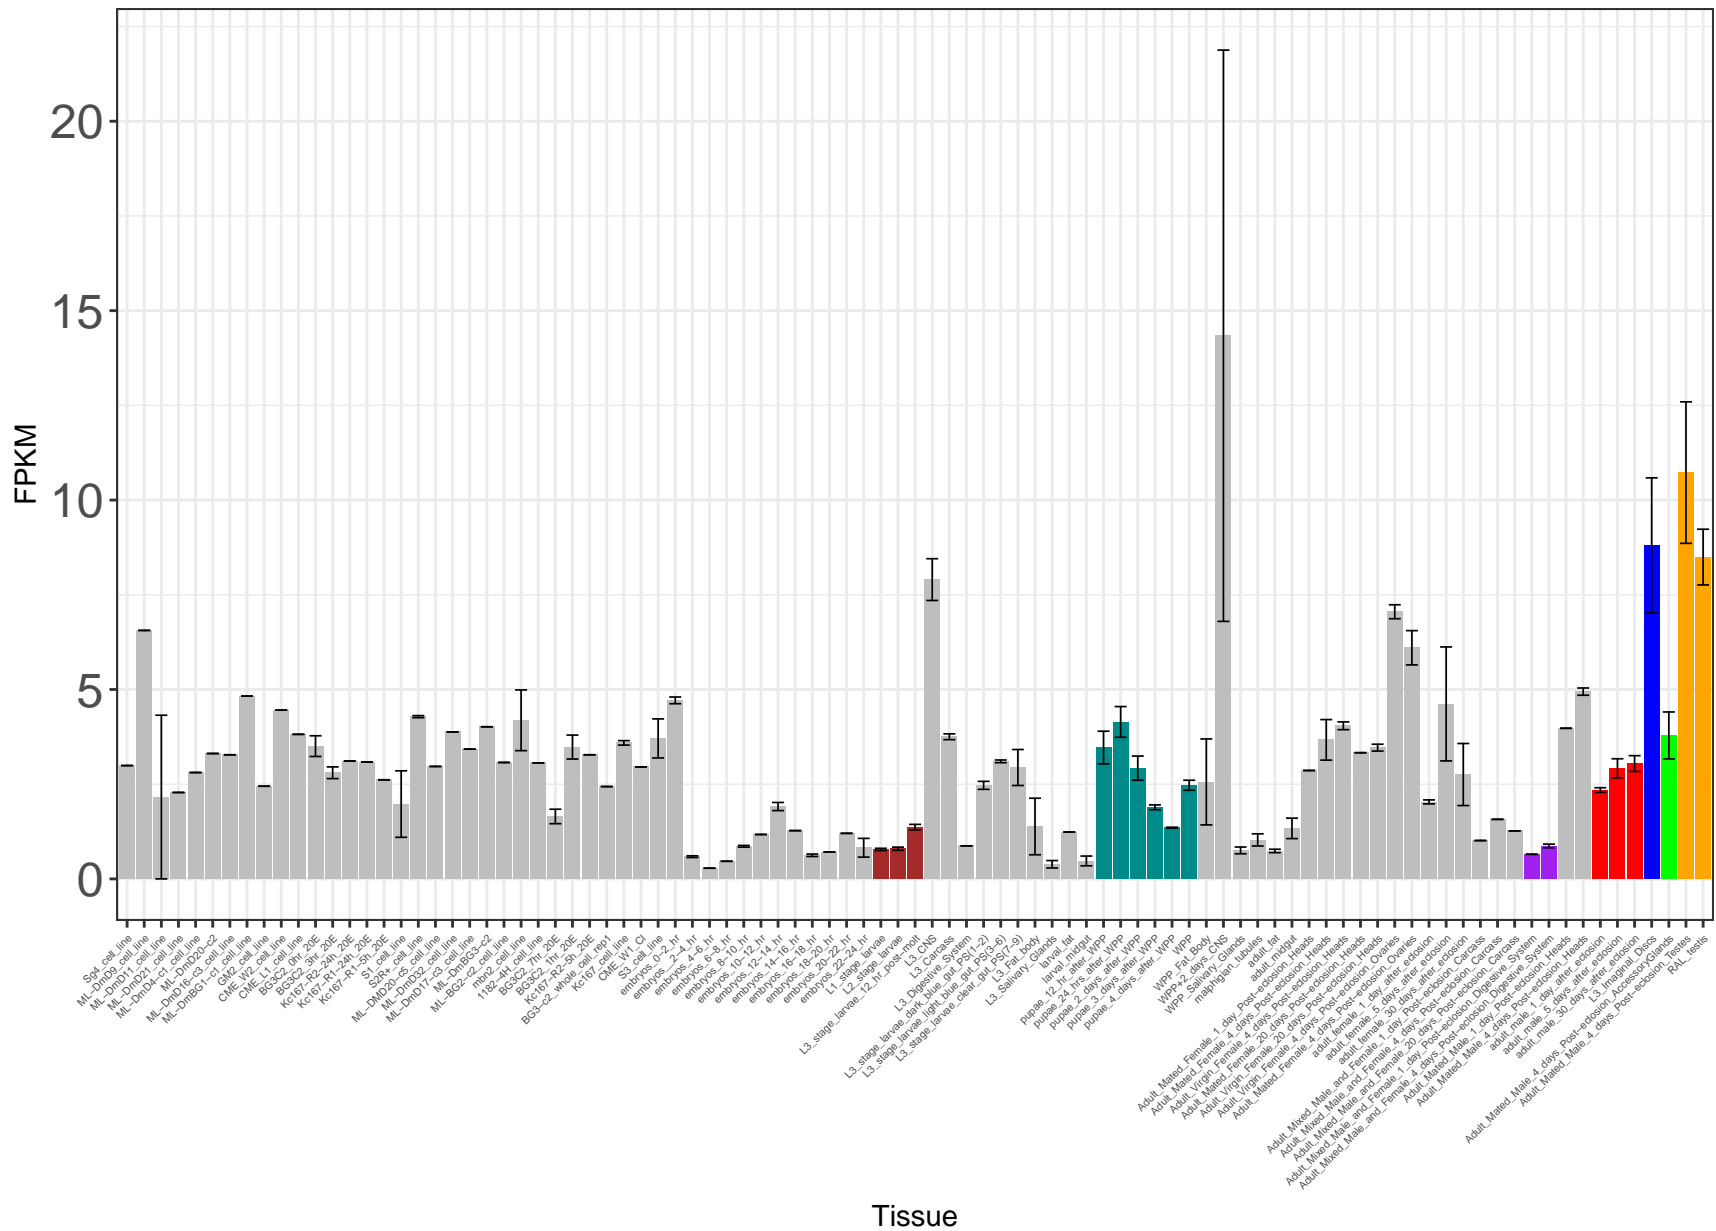





# mel-complex CR12842 – CR12842

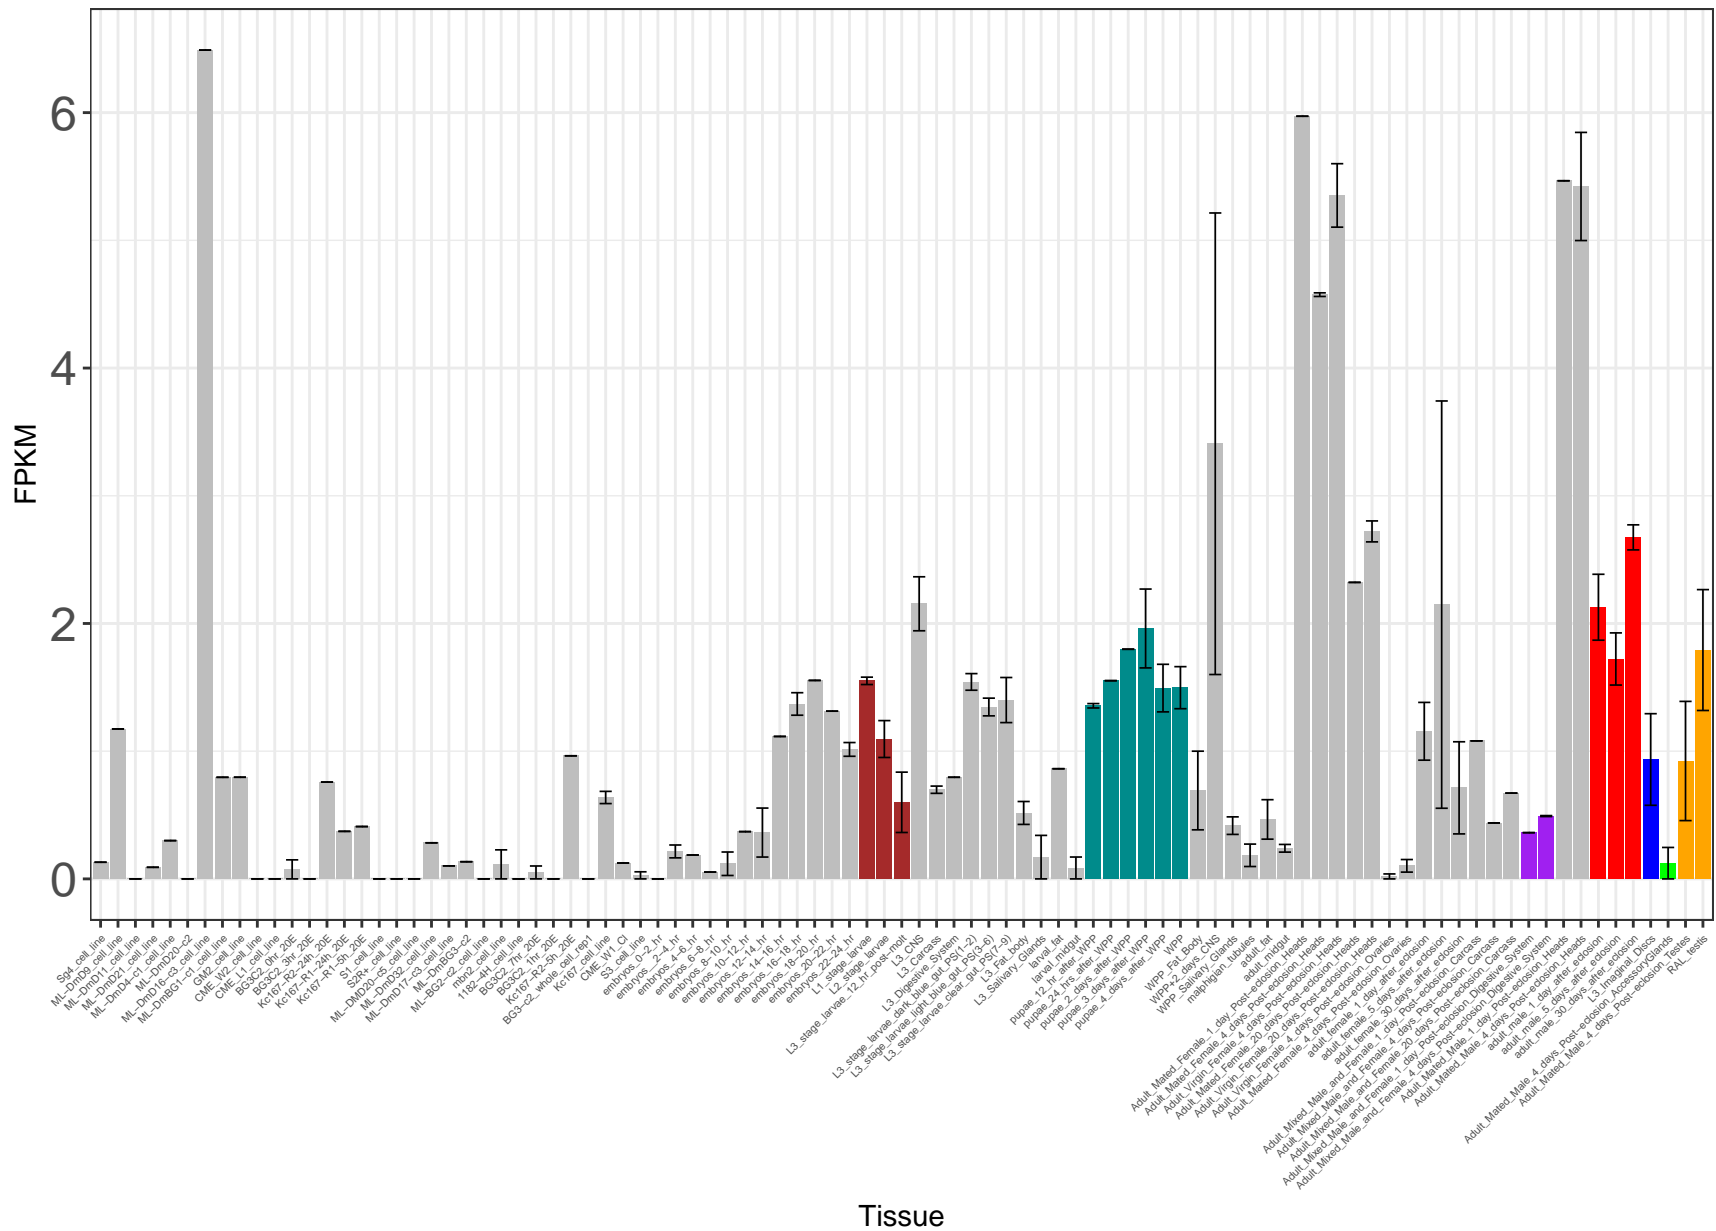



































# mel-complex SkpE – CG11942

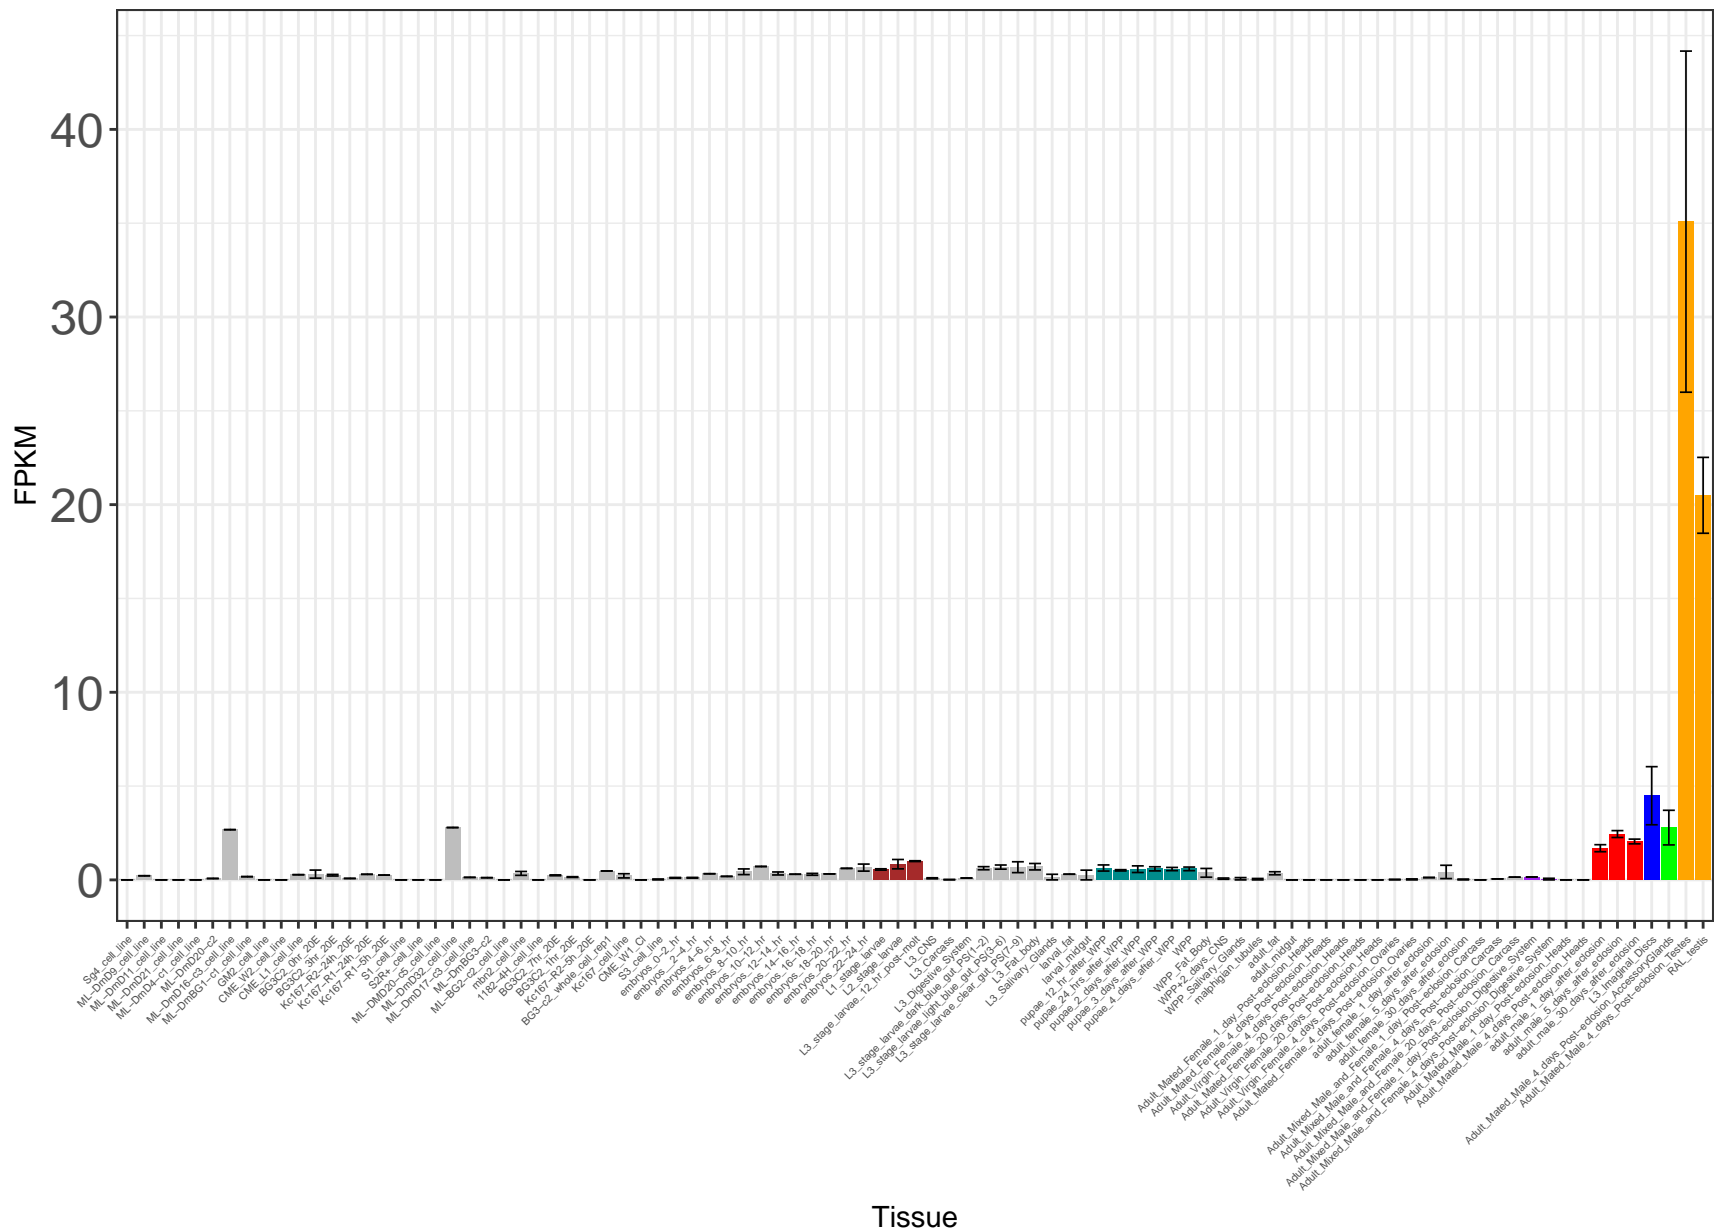



# mel-complex Tret1-2 - CG8234

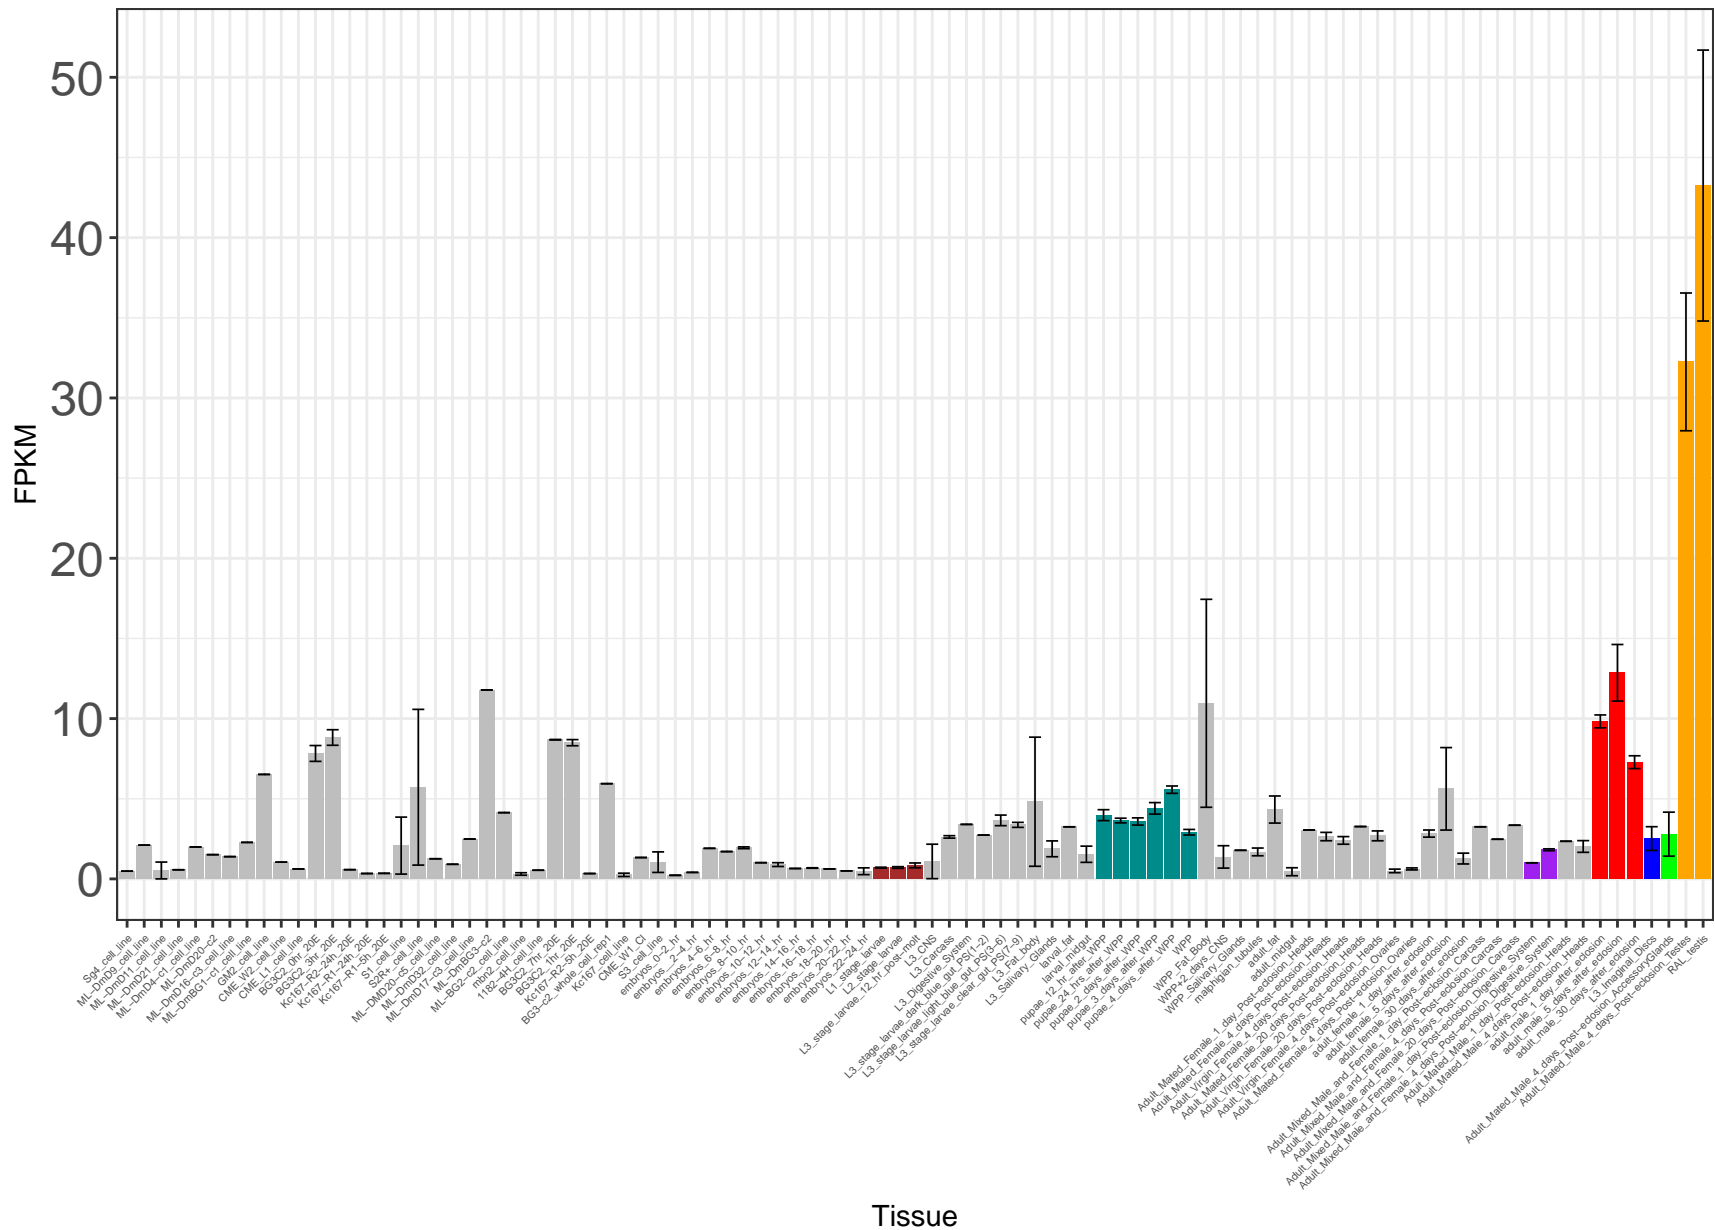

Supplement: supp_31.18.1841_Supplemental_FigS8.pdf [file supp_31.18.1841_Supplemental_FigS8.pdf]
