# Supplementary material for: New genes often acquire male-specific functions but rarely become essential in Drosophila
Source: PubMed Central journal article supplement — Genes Dev. 2017 Sep 15;31(18):1841–6. doi: 10.1101/gad.303131.117 (PMC5695085; doi:10.1101/gad.303131.117), 2017-09-15
Supplement: supp_31.18.1841_Supplemental_FigS4.pdf [file supp_31.18.1841_Supplemental_FigS4.pdf]

■ Chen et al. 2010/2012 (566 young genes)  
■ This study (616 additional young genes)

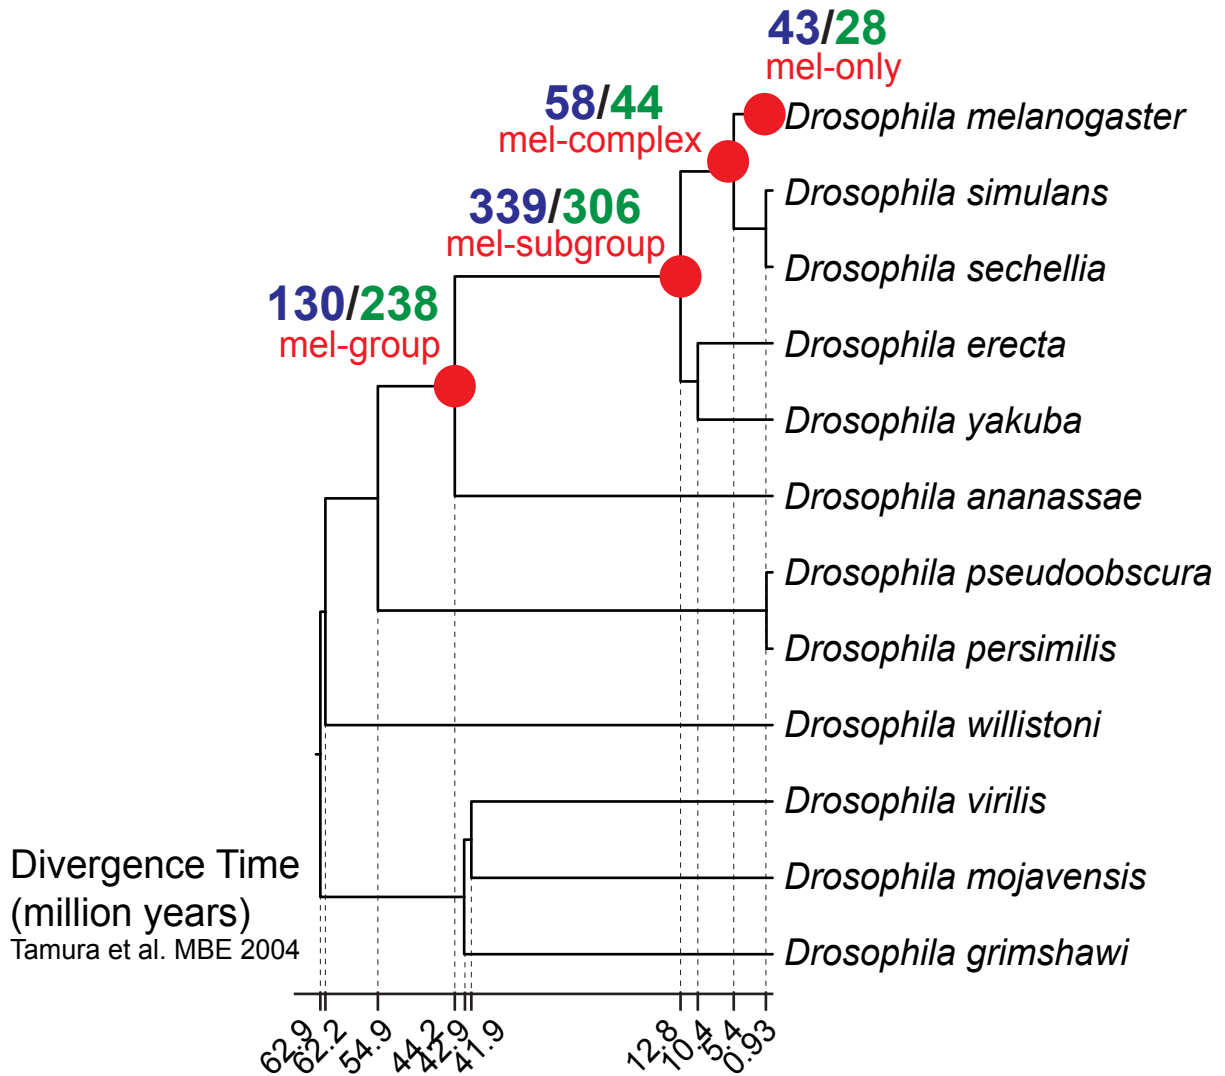

Supplementary Figure 4. Expanding the set of young *D. melanogaster* gene annotations.

Previous efforts by Long and colleagues defined 566 *D. melanogaster* genes that were born since the last common ancestor with *D. ananassae* ("mel-group"), which is intermediate in the sequenced Drosophilid phylogeny; about 3/4 of these emerged more recently within mel-subgroup species. By systematic assessment of modENCODE gene models and stringent inspection of genome synteny, we were able to double the number of young *D. melanogaster* genes.

Kondo et al,  
 Supplementary Figure 4
