# Supplementary material for: New genes often acquire male-specific functions but rarely become essential in Drosophila
Source: PubMed Central journal article supplement — Genes Dev. 2017 Sep 15;31(18):1841–6. doi: 10.1101/gad.303131.117 (PMC5695085; doi:10.1101/gad.303131.117), 2017-09-15
Supplement: supp_31.18.1841_Supplemental_FigS5.pdf [file supp_31.18.1841_Supplemental_FigS5.pdf]

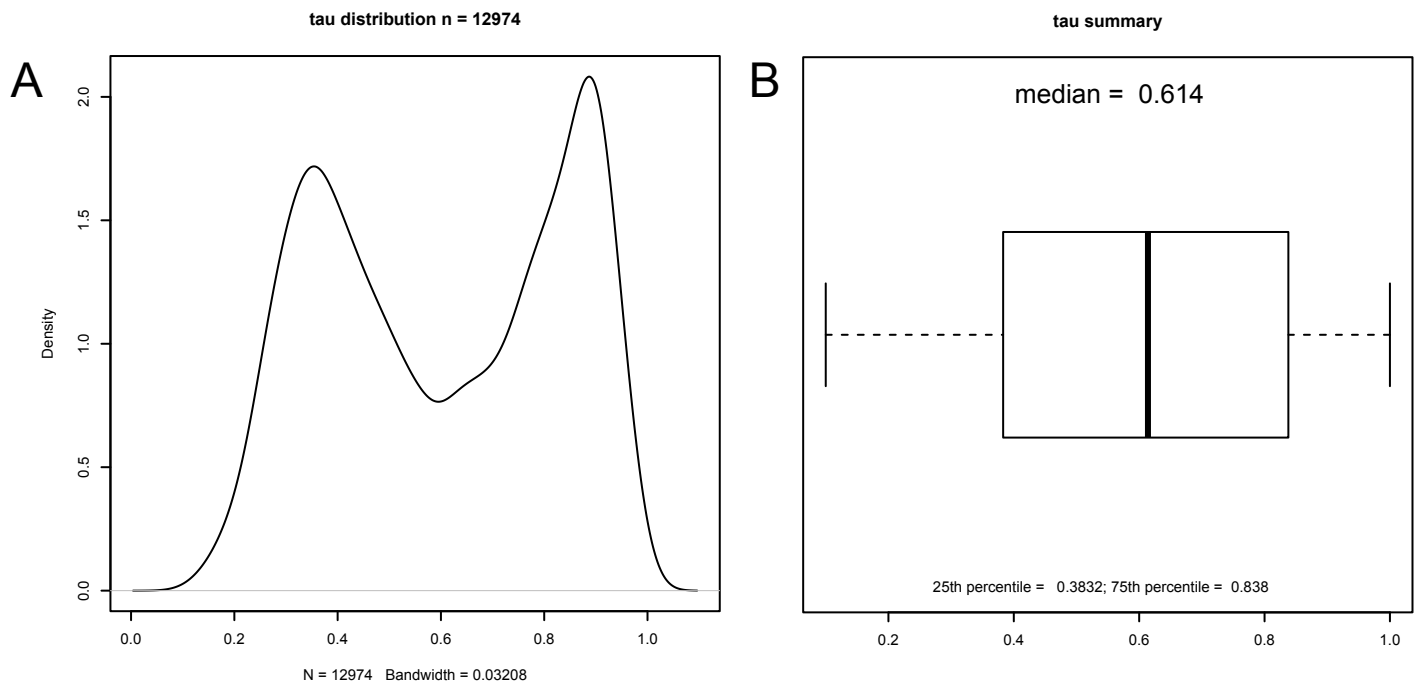

Supplementary Figure 5. Bimodal distribution of tissue specificity of *Drosophila* genes. (A) We calculated tissue specificity index ( $\tau$ ) for 12974 genes based on modENCODE RNA-seq data from 80 developmental stages, dissected tissues and cell lines. (B) Box and whiskers distribution plot of  $\tau$  values; median is 0.614.
