# Supplementary material for: New genes often acquire male-specific functions but rarely become essential in Drosophila
Source: PubMed Central journal article supplement — Genes Dev. 2017 Sep 15;31(18):1841–6. doi: 10.1101/gad.303131.117 (PMC5695085; doi:10.1101/gad.303131.117), 2017-09-15
Supplement: supp_31.18.1841_Supplemental_FigS6.pdf [file supp_31.18.1841_Supplemental_FigS6.pdf]

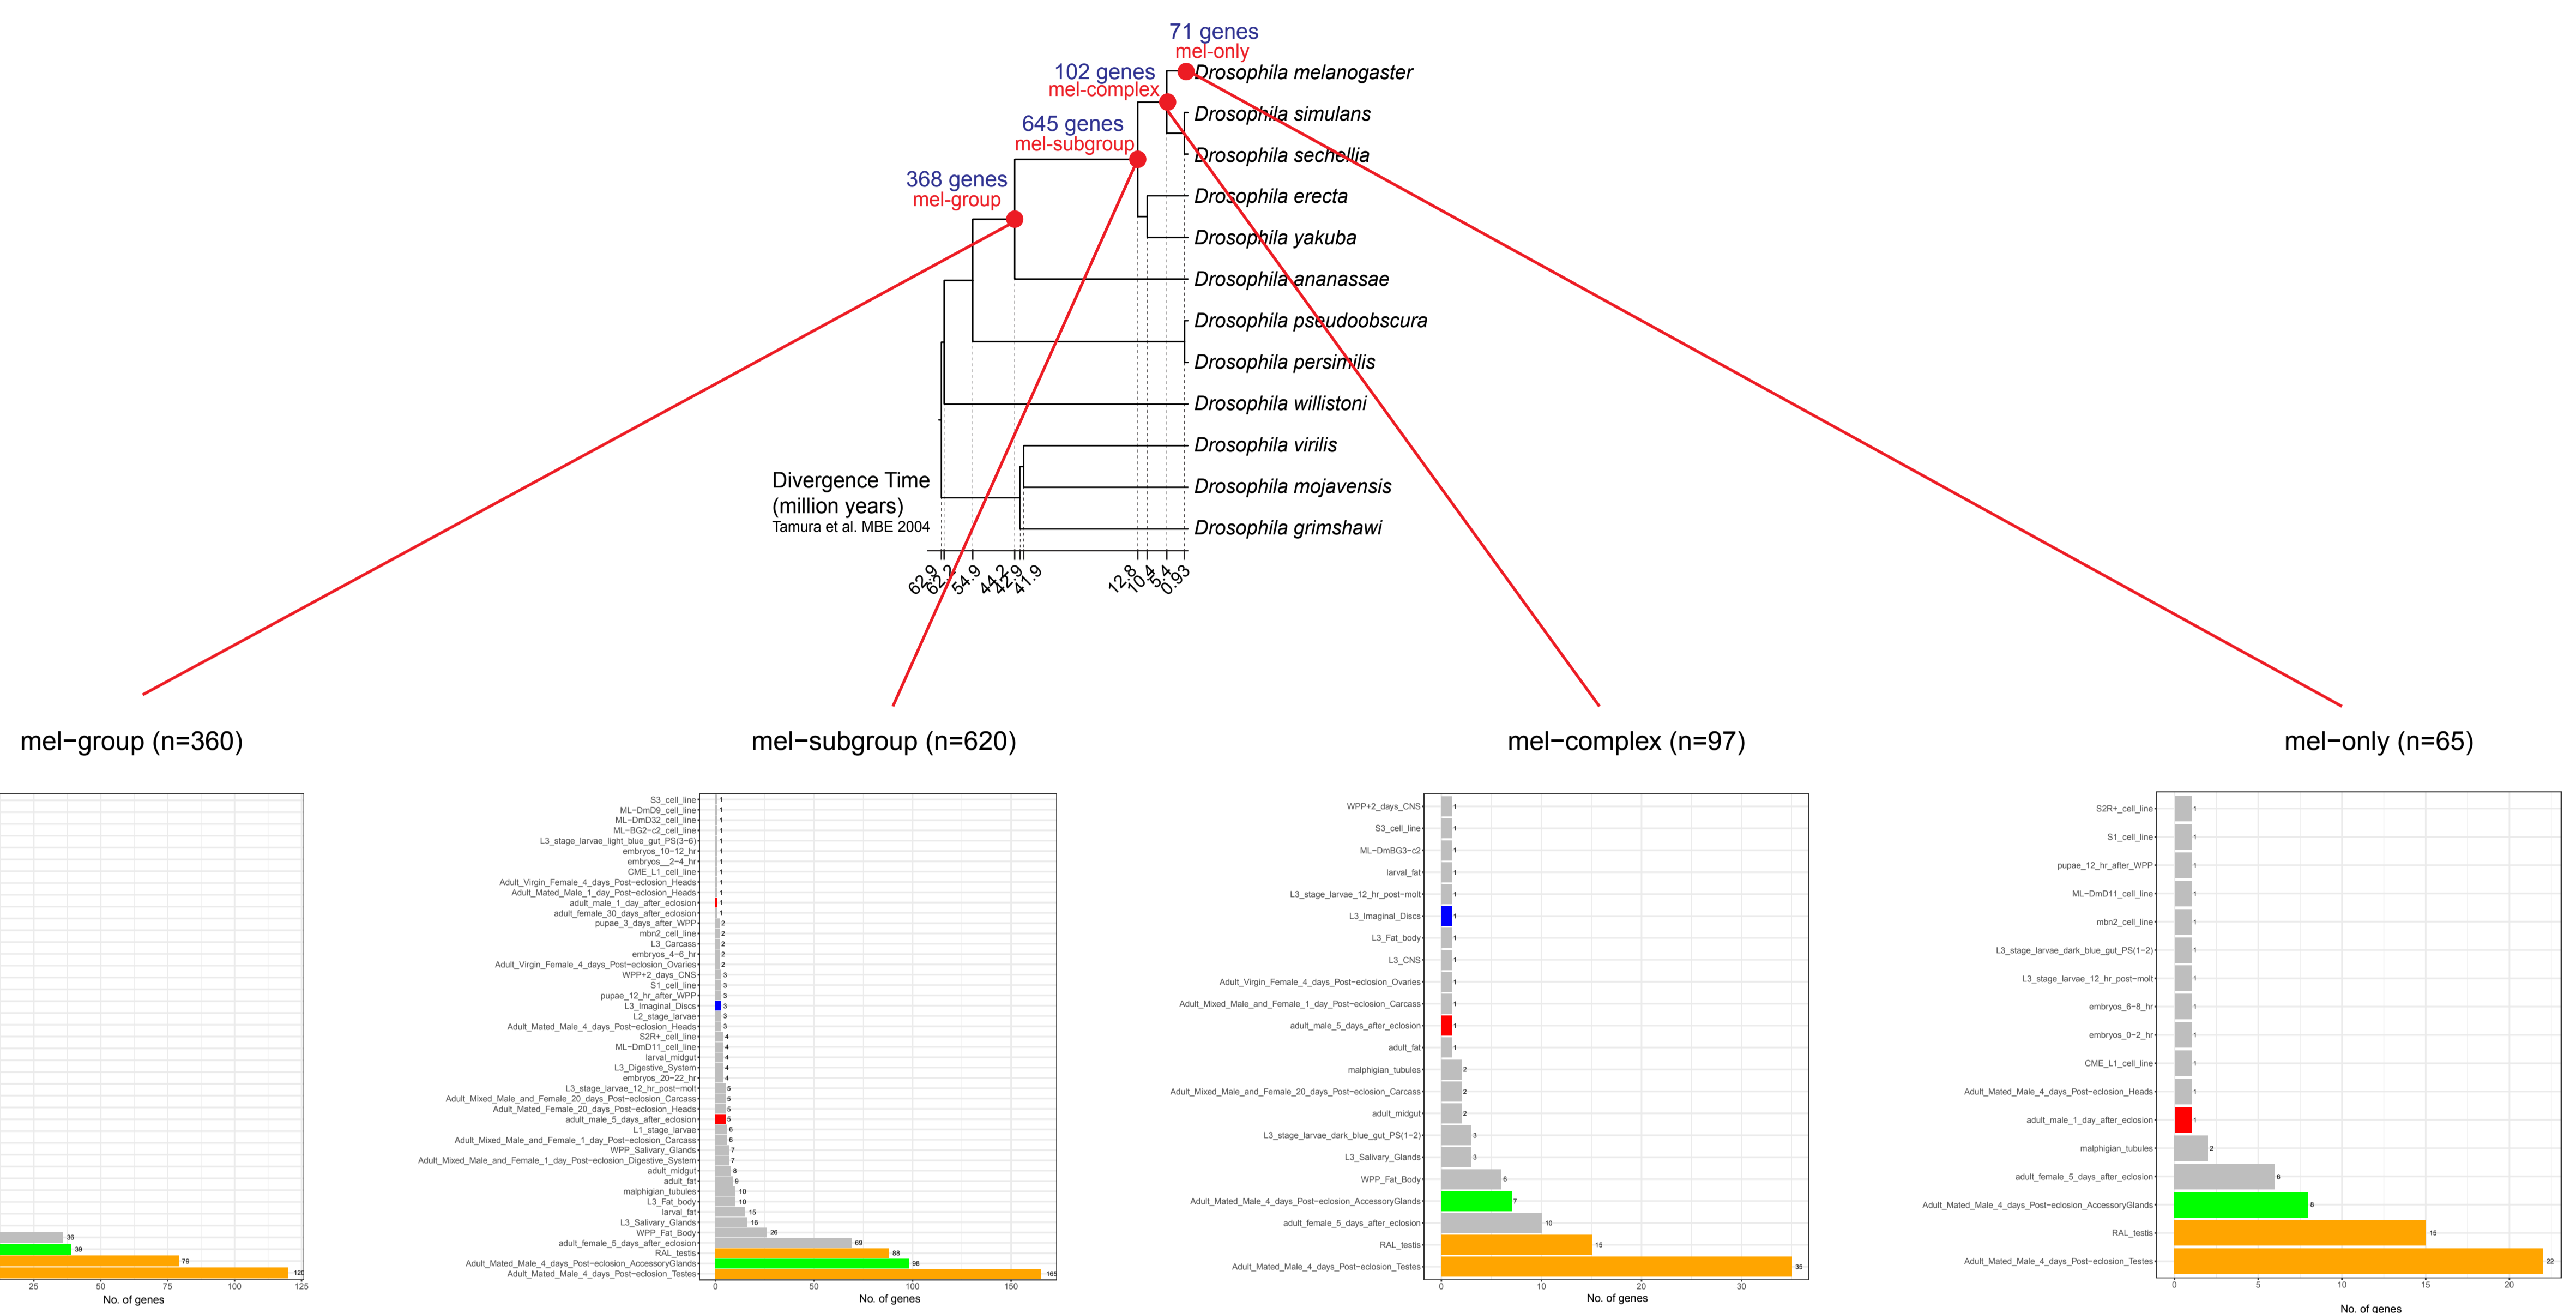

Supplementary Figure 6. Summary of expression biases of young *Drosophila* genes to the male reproductive system.

These barplots summarize the library type of maximal expression (“xmax”) from ~80 developmental stages/tissues/cell lines RNA-seq datasets, for sets of evolutionarily young *Drosophila* genes across various age groups. These data represent summaries of individual gene expression plots provided in Supplementary Figures 7-10 for mel-group genes (present in *Dmel/sim/sech/ere/yak/ana*), mel-subgroup genes (present in *Dmel/sim/sech/ere/yak*), mel-complex genes (present in *Dmel/sim/sech*) and genes that are present only in *Dmel*. Only those genes with expression are plotted; thus, there are fewer loci analyzed by expression than are analyzed by genomic alignment/homology. Note the preponderance of genes whose “xmax” is in testis or accessory glands.

Kondo et al,  
Supplementary Figure 6
