# Supplementary material for: New genes often acquire male-specific functions but rarely become essential in Drosophila
Source: PubMed Central journal article supplement — Genes Dev. 2017 Sep 15;31(18):1841–6. doi: 10.1101/gad.303131.117 (PMC5695085; doi:10.1101/gad.303131.117), 2017-09-15

**Supplementary Figure 7.** Spatiotemporal expression patterns for individual *D. melanogaster* genes lacking orthologs in other *Drosophila* species.



















# mel-only CG32797 – CG32797

FPKM

15  
10  
5  
0

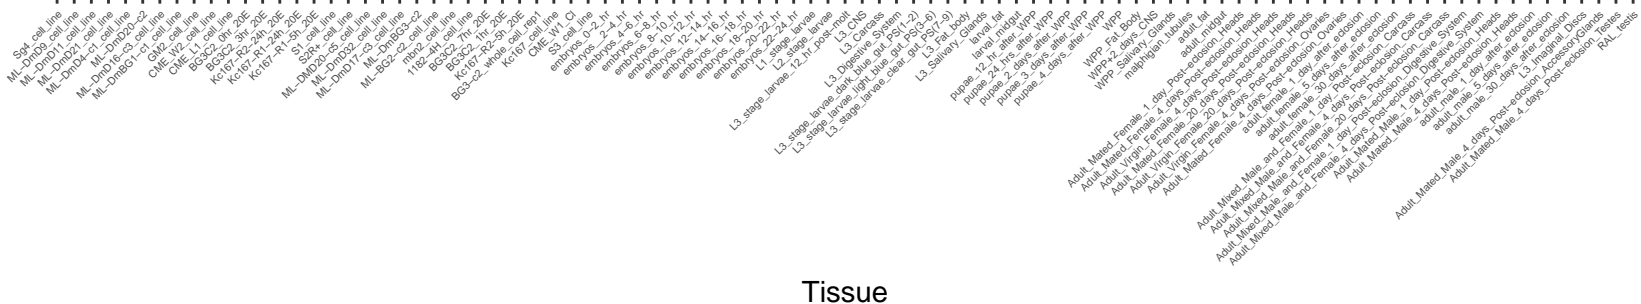



# mel-only CG33665 – CG33665

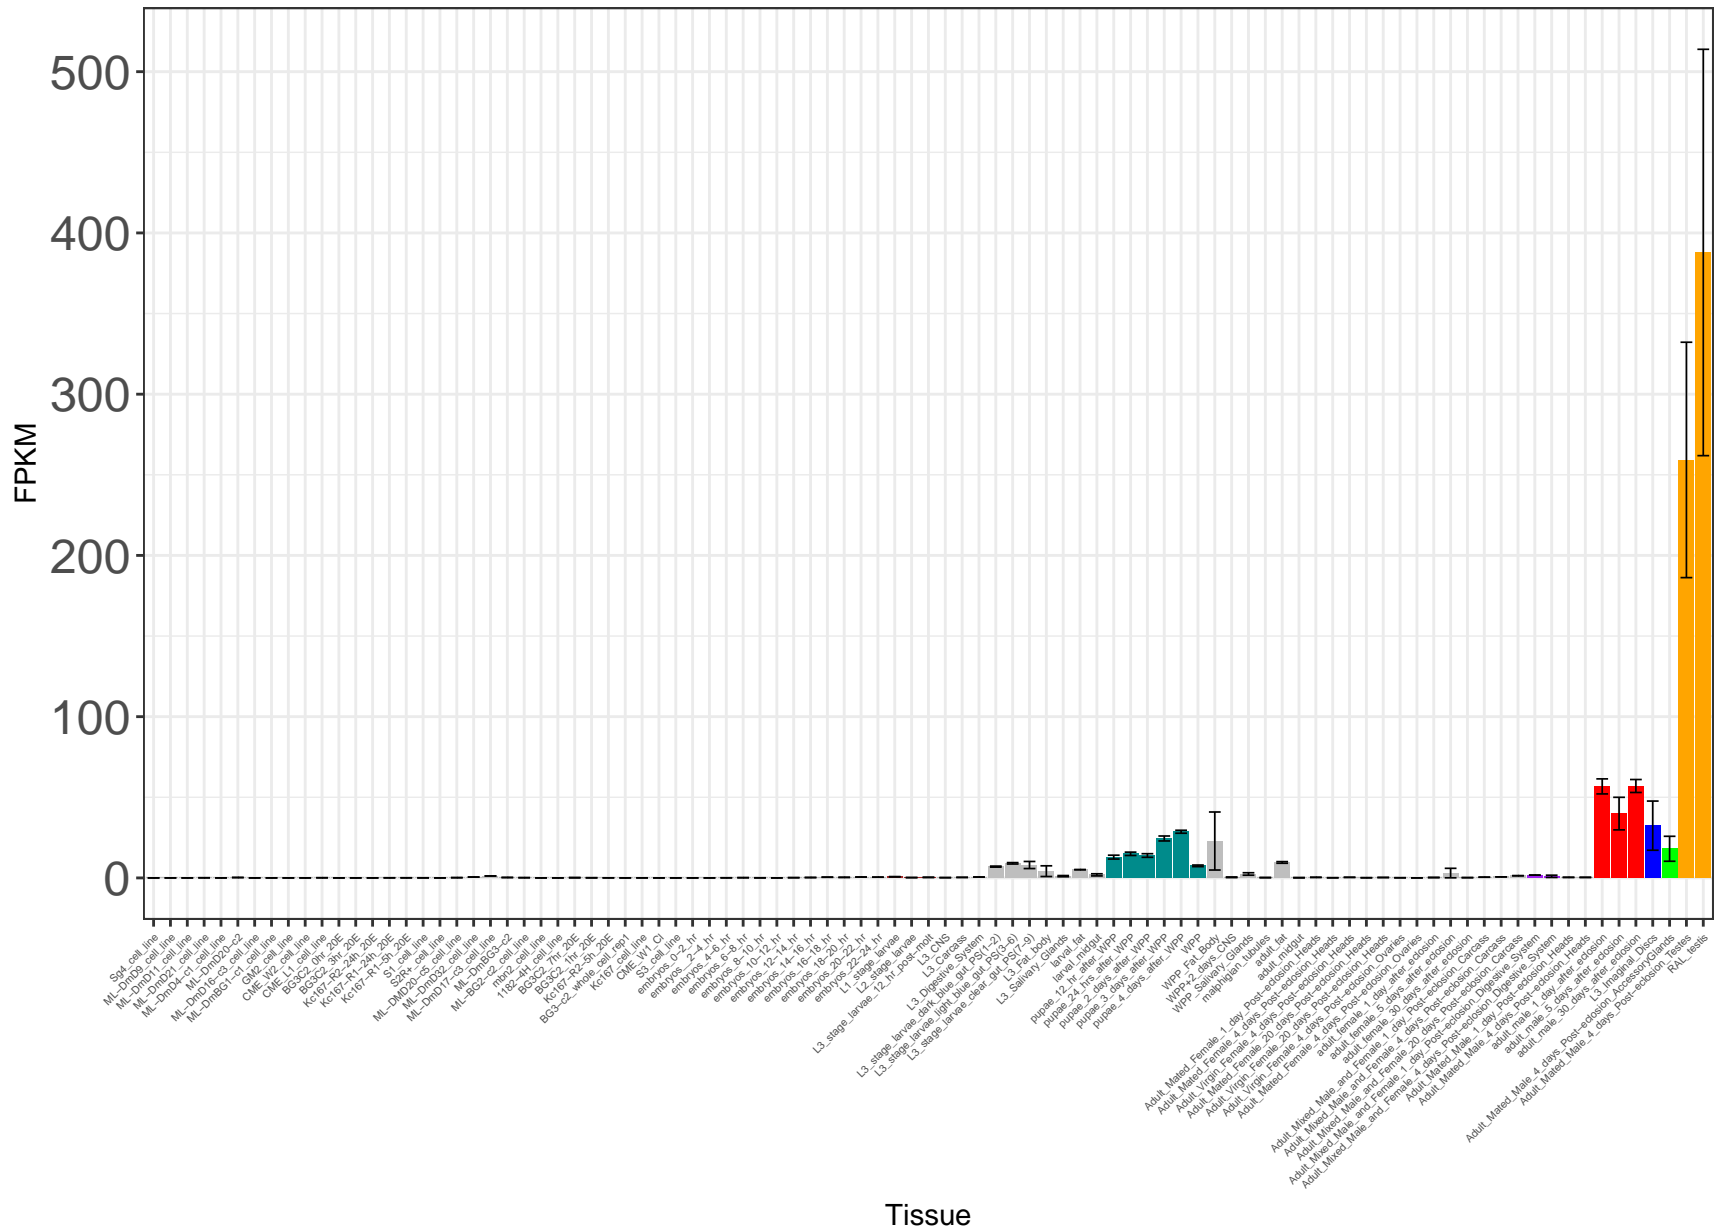

# mel-only CG33666 – CG33666

FPKM

400  
200  
0

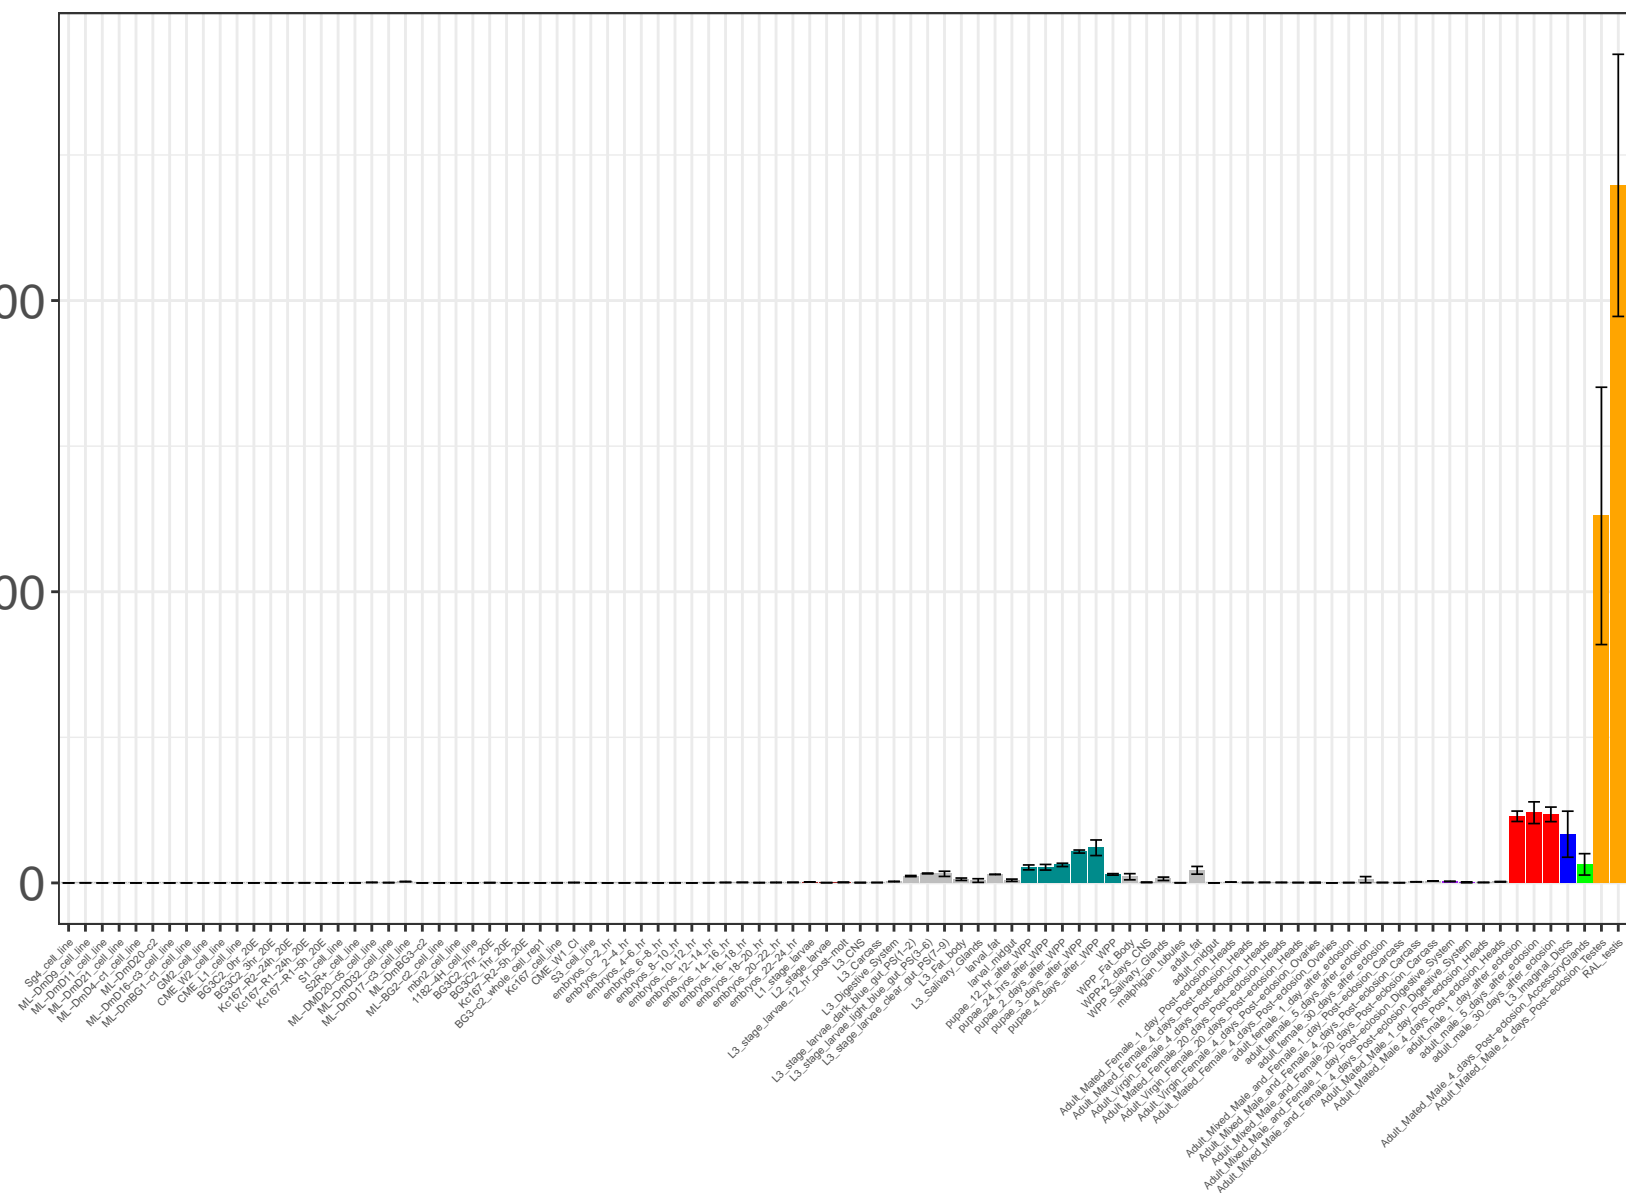

Tissue











# mel-only CG42299 – CG42299

FPKM

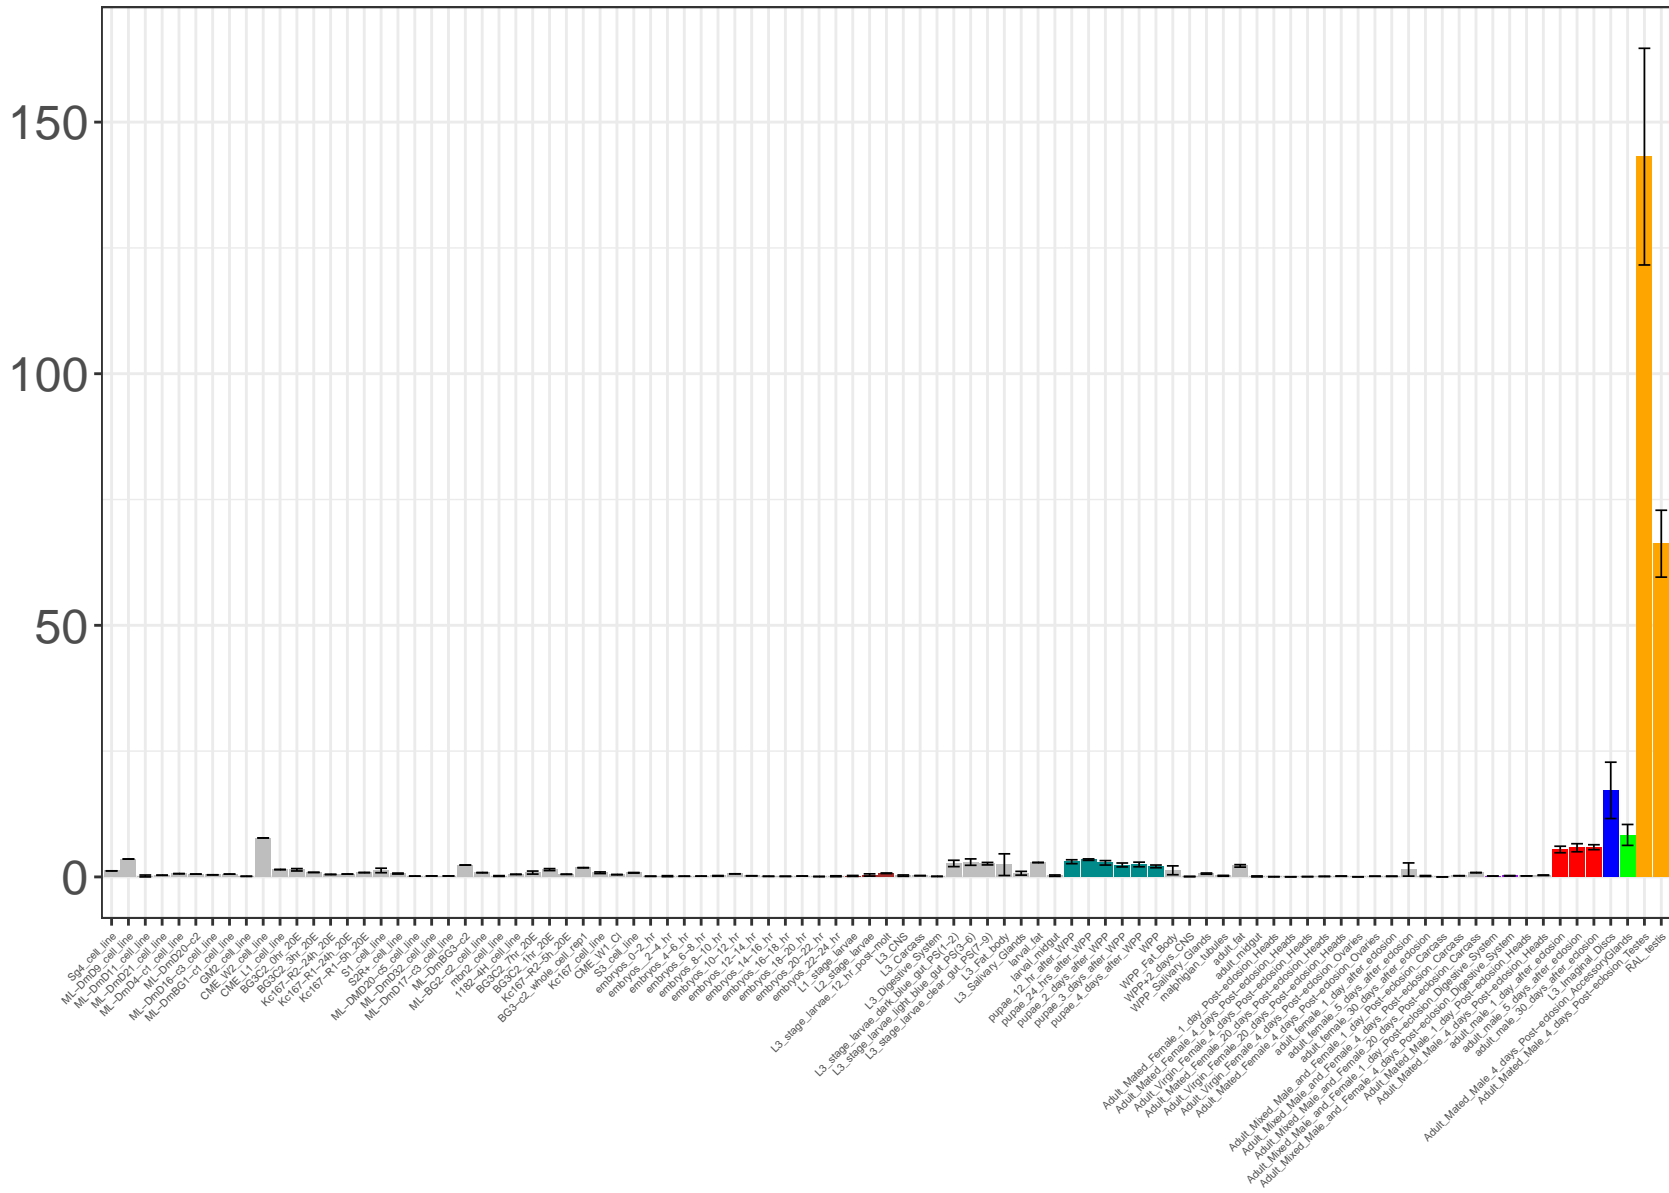

































# mel-only CG9123 – CG9123

FPKM

200

100

0

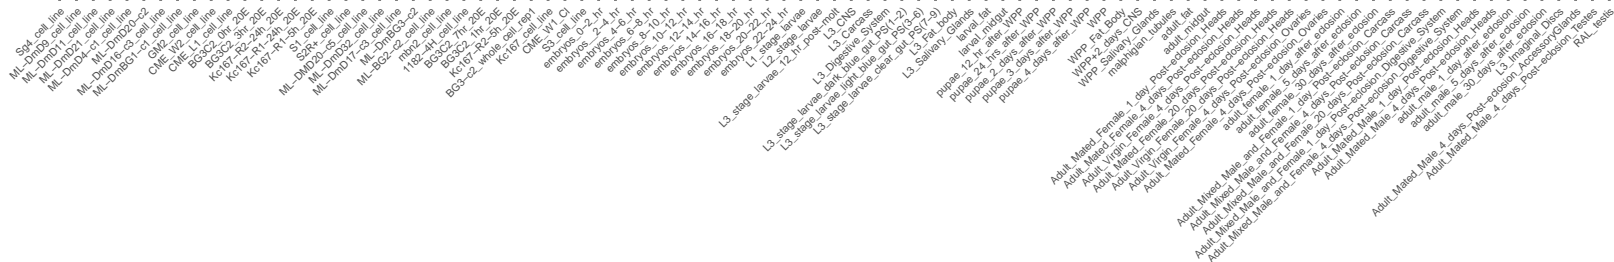

Tissue



# mel-only CR11386 – CR11386

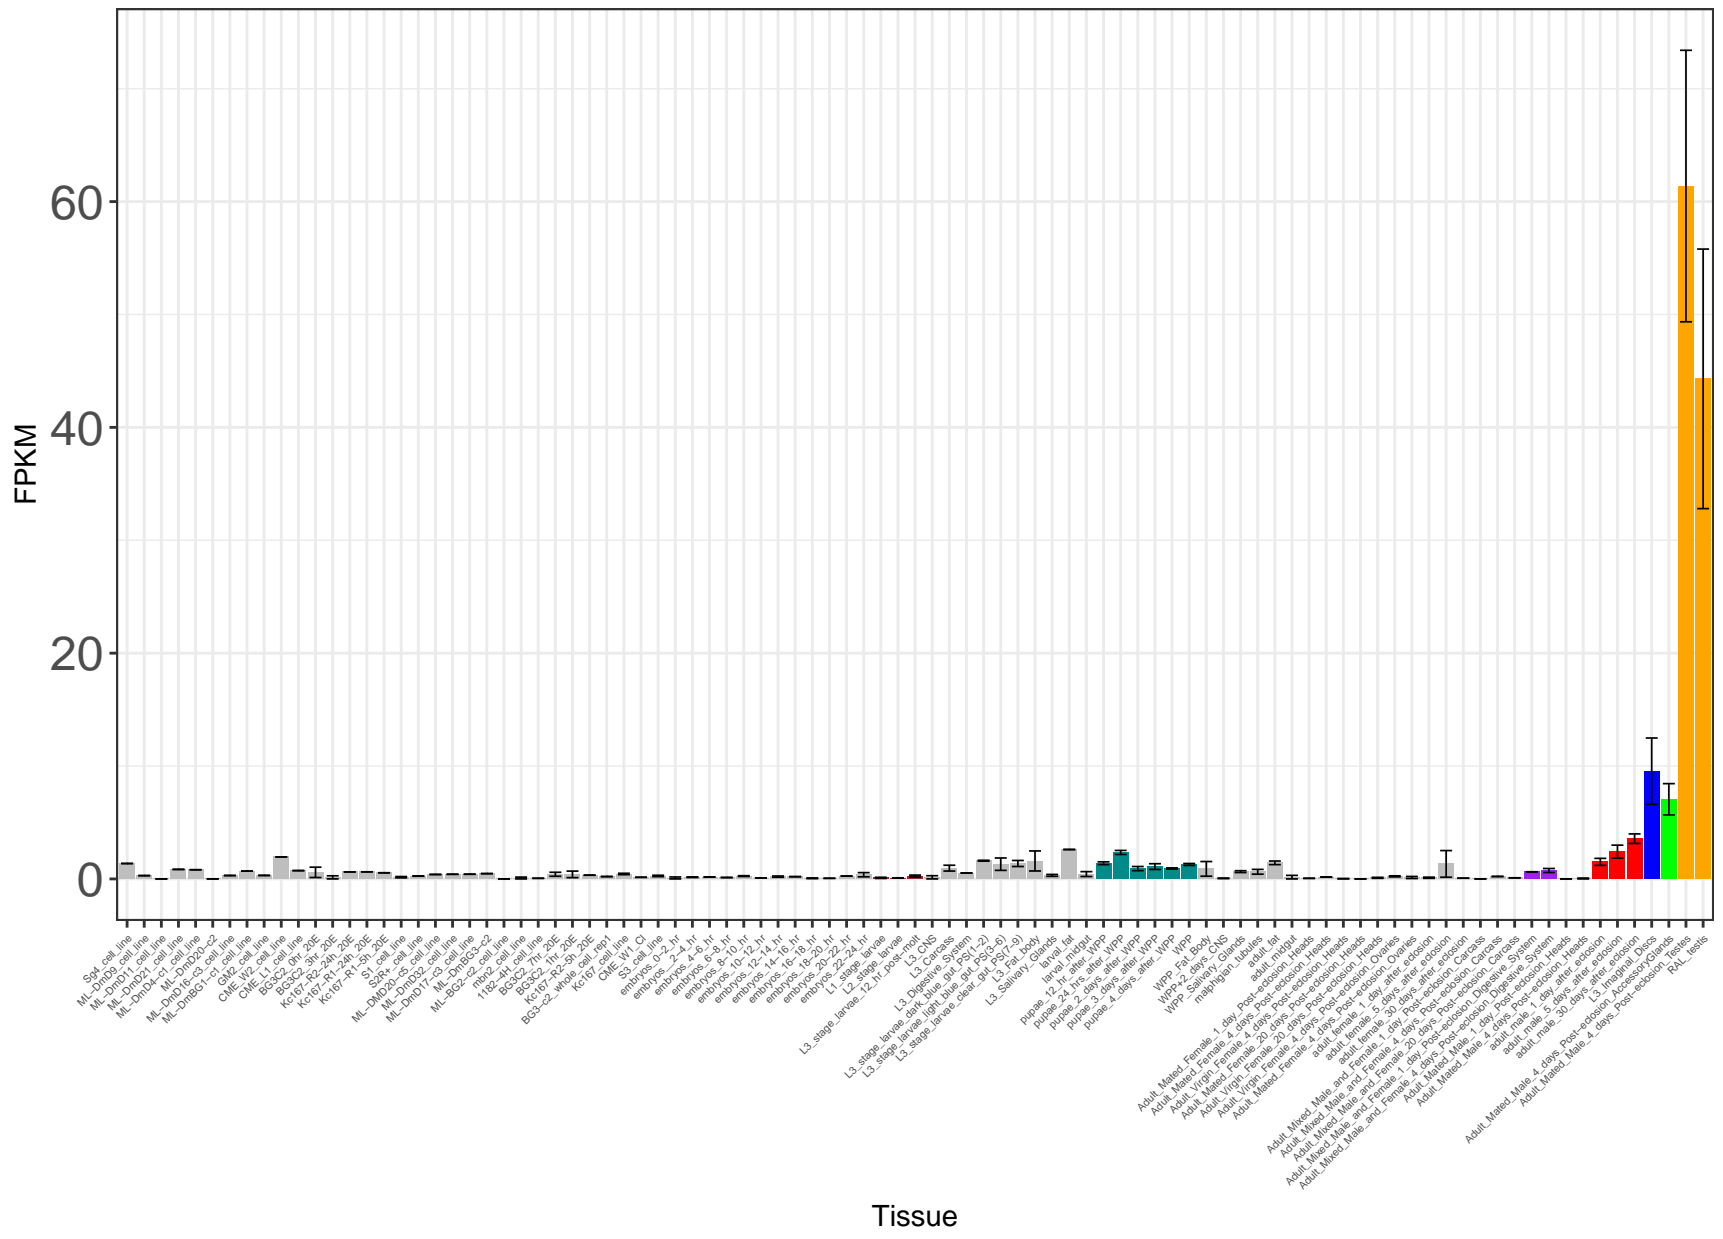

Supplement: supp_31.18.1841_Supplemental_FigS7.pdf [file supp_31.18.1841_Supplemental_FigS7.pdf]
