# Supplementary material for: New genes often acquire male-specific functions but rarely become essential in Drosophila
Source: PubMed Central journal article supplement — Genes Dev. 2017 Sep 15;31(18):1841–6. doi: 10.1101/gad.303131.117 (PMC5695085; doi:10.1101/gad.303131.117), 2017-09-15
Supplement: supp_31.18.1841_Supplemental_FigS11.pdf [file supp_31.18.1841_Supplemental_FigS11.pdf]

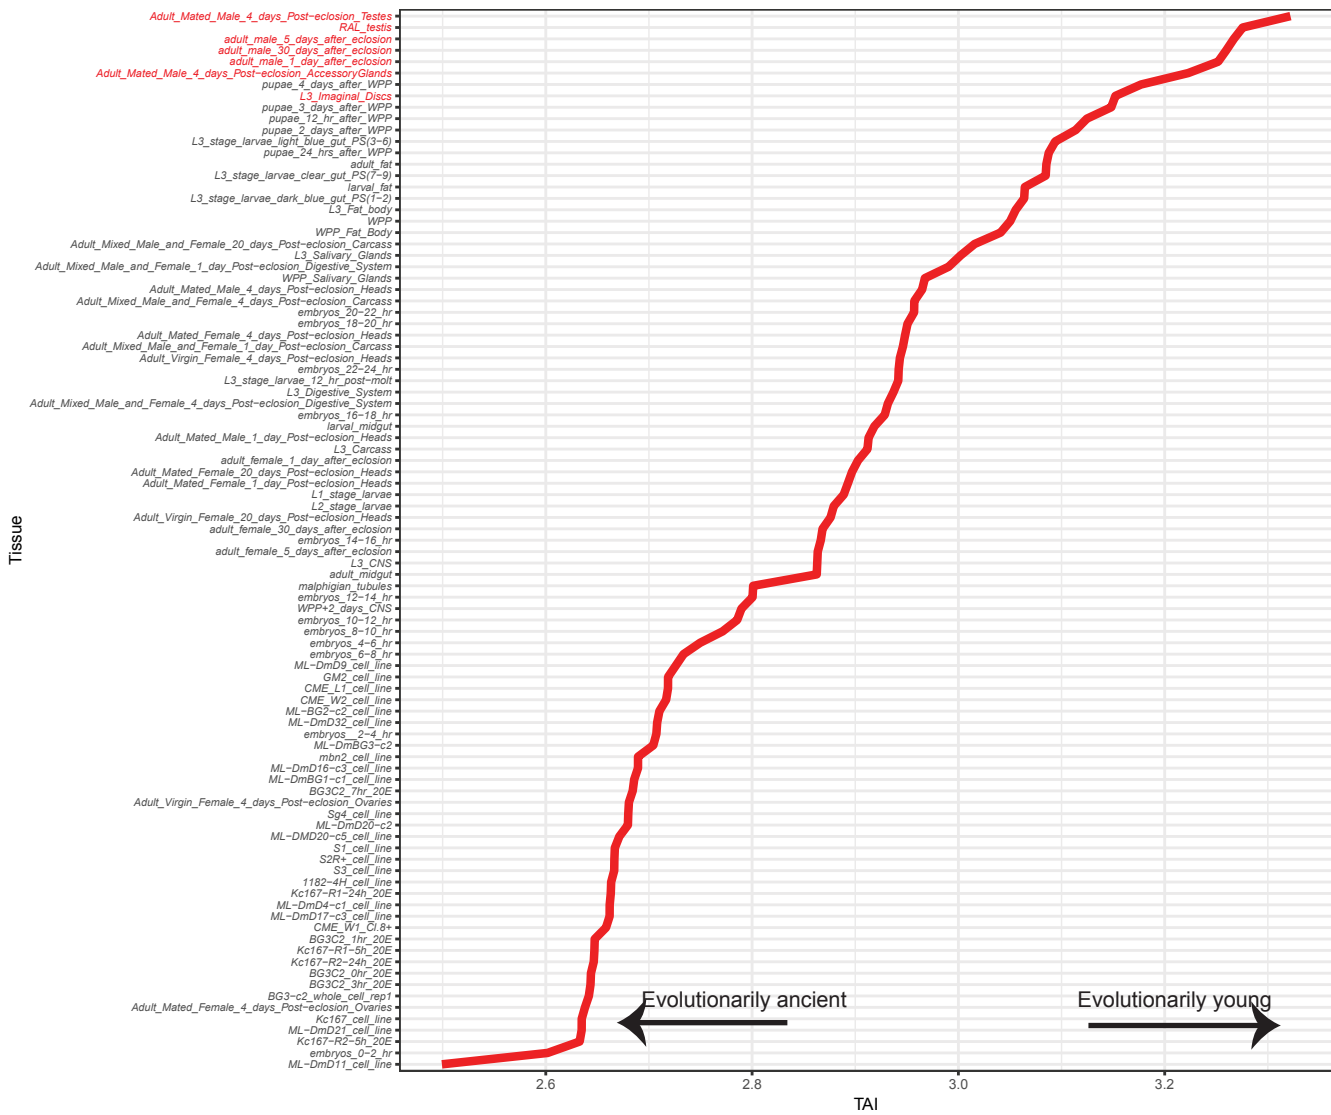

Supplementary Figure 11. Transcriptome age indices (TAI) for *Drosophila* tissues, stages and cells.

The TAI is weighted expression metric that utilizes evolutionary information to convey the relative age of the transcriptome. The libraries with the highest outlier TAI scores are testis, adult male and accessory glands, while the next highest cohort includes unsexed developmental stages that include male gonad material (larval imaginal disc/gonad, pupal stages, and certain larval stages). Note that the lowest TAI cohort includes all the different cell lines, as well as ovaries and early embryos that contain maternally deposited transcriptome.
