# Supplementary material for: New genes often acquire male-specific functions but rarely become essential in Drosophila
Source: PubMed Central journal article supplement — Genes Dev. 2017 Sep 15;31(18):1841–6. doi: 10.1101/gad.303131.117 (PMC5695085; doi:10.1101/gad.303131.117), 2017-09-15
Supplement: supp_31.18.1841_Supplemental_FigS13.pdf [file supp_31.18.1841_Supplemental_FigS13.pdf]

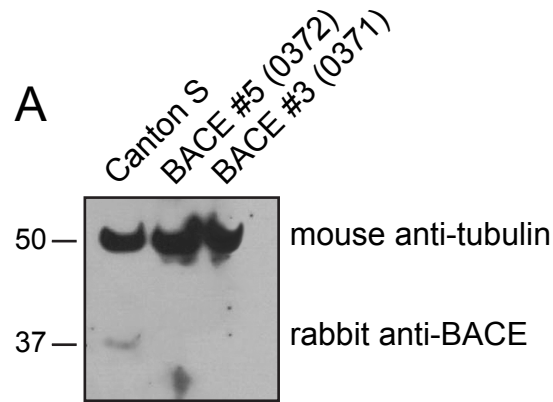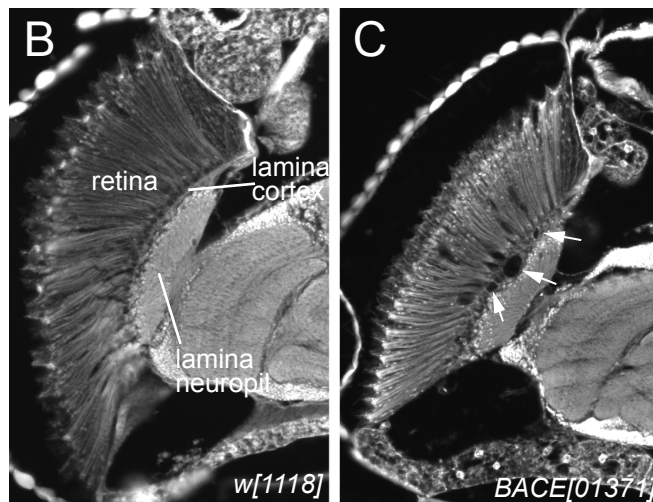

Supplementary Figure 13. Viable BACE CRISPR mutants reproduce glial degeneration in known BACE alleles. (A) Western blot analysis shows that newly-generated CRISPR alleles lack detectable BACE protein. (B-C) Sections of 32 day old fly retinas. (B) Control *w[1118]* eye. In between the retina and the lamina neuropil lies the lamina cortex, which contains the glial and neuronal cell bodies; the lamina neuropil contains only fibers and no cell bodies. (C) CRISPR *BACE* mutant shows degeneration of glial cells in the lamina cortex (holes marked by arrows). Note that some retinal degeneration is also visible in the *BACE* mutant but this is usually seen to some extent in *white* mutants, although it may be exacerbated by the glial death in the lamina cortex of *BACE* mutants.
